# Supplementary material for: ‘Can you recommend any good STI apps?’ A review of content, accuracy and comprehensiveness of current mobile medical applications for STIs and related genital infections
Source: PubMed Central journal article supplement (PMC5520270; doi:10.1136/sextrans-2016-052690), 2016-11-24
Supplement: sextrans-2016-052690supp001.pdf [file sextrans-2016-052690supp001.pdf]

**Web Table 1: Data extraction table for basic details**

| Section                                    | Parameter                          | Coding                                                                                           | Description                                                                   |
|--------------------------------------------|------------------------------------|--------------------------------------------------------------------------------------------------|-------------------------------------------------------------------------------|
| <b>Basic details</b>                       | Title of App                       | Text                                                                                             |                                                                               |
|                                            | Developer                          | Text                                                                                             | Name of software publisher (e.g Gooplay Apps)                                 |
|                                            | Country                            | Text                                                                                             | Country app designed in                                                       |
|                                            | Region                             | Text                                                                                             | Region app designed for (e.g. Wirral)                                         |
|                                            | Version                            | Numerical                                                                                        |                                                                               |
|                                            | Number of downloads                | Numerical                                                                                        | This is only available for Android apps                                       |
|                                            | Rating                             | Numerical                                                                                        |                                                                               |
|                                            | Number of ratings                  | numerical                                                                                        |                                                                               |
|                                            | Age restriction                    | text or numerical                                                                                | Numerical for iOS, text for Android                                           |
|                                            | Theme (e.g. health and fitness)    | Text                                                                                             |                                                                               |
|                                            | Price (£)                          | numerical (£0.00)                                                                                |                                                                               |
|                                            | Last date updated                  | Date                                                                                             |                                                                               |
|                                            | Author's description of app        | Text                                                                                             | What is stated in iTunes store or google play store.                          |
|                                            | Our description of app             | Text                                                                                             | This is your description of the app                                           |
|                                            | Target audience                    | 1= general public 2 = people with STI 3= parents 4= other                                        |                                                                               |
|                                            | Target audience_4                  | Text (99 =N/A)                                                                                   |                                                                               |
|                                            | Include/Exclude                    | 1= include 2= exclude                                                                            |                                                                               |
|                                            | Reason for exclusion               | text (99=N/A)                                                                                    |                                                                               |
|                                            | General terms (e.g. sexual health) | text (99=absent)                                                                                 | This is a list of the general search terms that the app has been found under  |
|                                            | Specific terms (e.g. chlamydia)    | text (99=absent)                                                                                 | This is a list of the specific search terms that the app has been found under |
| Number of different terms apps appeared in | Numerical                          | This is the number of general terms and specific terms that the apps has been found under summed |                                                                               |

**Web Table 2: Data extraction of adapted HON criteria\***

| Section              | Parameter                                                                  | Coding                                  | Description                                            |
|----------------------|----------------------------------------------------------------------------|-----------------------------------------|--------------------------------------------------------|
| Adapted HON Criteria | Author named                                                               | 1 = yes 2= no                           | The actual author of the app named (not the publisher) |
|                      | Training stated                                                            | 1 = yes 2= no                           |                                                        |
|                      | Qualification clearly stated                                               | 1 = yes 2 = no                          |                                                        |
|                      | Clearly stated that info is supportive and not a replacement               | 1 = completely 2= partially 3 = absent  |                                                        |
|                      | App mission, purpose and audience stated                                   | 1 = completely 2= partially 3 = absent  |                                                        |
|                      | Organisation behind app described, incl purpose and mission                | 1 = completely 2= partially 3 = absent  |                                                        |
|                      | Privacy policy incl info on how emails are managed if used                 | 1 = completely 2= partially 3 = absent  |                                                        |
|                      | Documented, referenced and dated                                           | 1 = completely 2 = partially 3 = absent |                                                        |
|                      | Medical content date of creation present                                   | 1= yes 2 = no                           |                                                        |
|                      | Medical content date of modification present                               | 1= yes 2= no                            |                                                        |
|                      | Grammar and spelling correct                                               | 1 = yes 2 = no                          |                                                        |
|                      | All claims backed up with scientific evidence                              | 1 = completely 2= partially 3 = absent  |                                                        |
|                      | App operational                                                            | 1= yes 2= no                            |                                                        |
|                      | Information accessible and clearly stated                                  | 1= yes 2= no                            |                                                        |
|                      | Method of contacting app publisher                                         | 1 = yes 2= no                           |                                                        |
|                      | Source/s of funding stated                                                 | 1 = yes 2 = no 3= not applicable        |                                                        |
|                      | Conflicts of interest and external influences clearly stated in disclaimer | 1 = yes 2 = no 3 = not applicable       |                                                        |
|                      | Those with paying banners have advertising policy                          | 1= yes 2= no 3= not applicable          |                                                        |
|                      | Any conflict of interest explained                                         | 1 = yes 2 = no 3 = not applicable       |                                                        |
|                      | Approved by NHS choices                                                    | 1= yes 2=no                             |                                                        |

\*Health On the NET (HON) Foundation principles for health information on the internet

**Web Table 3: Comprehensiveness of content**

| Section                                   | Parameter                        | Coding                                 | Description                                                                                                                                                                                                |
|-------------------------------------------|----------------------------------|----------------------------------------|------------------------------------------------------------------------------------------------------------------------------------------------------------------------------------------------------------|
| Comprehensiveness of clinical information |                                  | 1 = completely 2= partially 3 = absent | Completely = information on all or the majority (i.e. >75% or 3 or more) of aspects to do with parameter; Partial = information on 1 or more aspect to do with parameter but <75%; Absent = no information |
|                                           | Safe sex                         | 1 = completely 2= partially 3 = absent | Information on health promotion (e.g. condoms) and how to prevent onward transmission of STI/s                                                                                                             |
|                                           | Testing                          | 1 = completely 2= partially 3 = absent | information on where and how you can get tested (blood test/ swabs at clinics etc.)                                                                                                                        |
|                                           | Diagnosis                        | 1 = completely 2= partially 3 = absent | what exactly the tests were/ how they were processed/ what they looked at                                                                                                                                  |
|                                           | Information about STIs/infection | 1 = completely 2= partially 3 = absent | Information about 1 or more STI/infection including on aetiology/pathogenesis, symptoms, prevention, transmission, natural history                                                                         |
|                                           | Management                       | 1 = completely 2= partially 3 = absent | Information about accessing treatment, what treatment is required, follow-up etc.                                                                                                                          |
|                                           | Partner notification             | 1 = completely 2= partially 3 = absent | Information about the need to inform partners, abstaining from sex until partner treated, look back time for PN                                                                                            |
|                                           | ePrescribing                     | 1 = completely 2= partially 3 = absent | Able to get an ePrescription or information on this                                                                                                                                                        |
|                                           | Contraception                    | 1 = completely 2= partially 3 = absent | Information about different forms of contraception                                                                                                                                                         |
|                                           | Service provision                | 1=completely 2=partially 3=absent      | Information about where to access clinics, condoms, or contraceptive services.                                                                                                                             |
|                                           | Other                            | Text                                   | List any other aspects that are covered                                                                                                                                                                    |
|                                           | Chlamydia                        | 1 = completely 2= partially 3 = absent | Completely = information on all or the majority (i.e. >75% or 3 or more) of aspects to do with parameter; Partial = information on 1 or more aspect to do with parameter but <75%; Absent = no information |
|                                           | Gonorrhoea                       | 1 = completely 2= partially 3 = absent |                                                                                                                                                                                                            |
|                                           | Mycoplasma                       | 1 = completely 2= partially 3 = absent |                                                                                                                                                                                                            |
|                                           | Genital warts                    | 1 = completely 2= partially 3 = absent |                                                                                                                                                                                                            |
|                                           | HPV                              | 1 = completely 2= partially 3 = absent |                                                                                                                                                                                                            |
|                                           | Genital herpes                   | 1 = completely 2= partially 3 = absent |                                                                                                                                                                                                            |
|                                           | Pubic lice                       | 1=completely 2=partially 3=absent      |                                                                                                                                                                                                            |
|                                           | Trichomonas vaginalis            | 1 = completely 2= partially 3 = absent |                                                                                                                                                                                                            |
|                                           | Vaginal candidiasis              | 1 = completely 2= partially 3 = absent |                                                                                                                                                                                                            |
|                                           | Bacterial vaginosis              | 1 = completely 2= partially 3 = absent |                                                                                                                                                                                                            |
|                                           | Non-specific urethritis          | 1 = completely 2= partially 3 = absent |                                                                                                                                                                                                            |
|                                           | Pelvic inflammatory disease      | 1 = completely 2= partially 3 = absent |                                                                                                                                                                                                            |
|                                           | Epididymitis                     | 1=completely 2=partially 3=absent      |                                                                                                                                                                                                            |

**Web Table 4: Accuracy of clinical information**

| Section                          | Parameter                                                                   | Coding                                                                      | Description                                                                                                                                                                                                                                                                                                                                                 |
|----------------------------------|-----------------------------------------------------------------------------|-----------------------------------------------------------------------------|-------------------------------------------------------------------------------------------------------------------------------------------------------------------------------------------------------------------------------------------------------------------------------------------------------------------------------------------------------------|
| Accuracy of clinical information | Safe sex                                                                    | 1= completely 2 = majority accurate 3 = partially accurate 4 = not accurate | Completely accurate = all information is accurate; Majority accurate = errors in only 1 aspect of the information (e.g. testing) or no more than 2 minor errors (i.e. will not impact on patient safety) throughout; Partially accurate = errors in more than 1 aspect of the information or more than 2 minor errors; Not accurate = completely inaccurate |
|                                  | Testing                                                                     | 1= completely 2 = majority accurate 3 = partially accurate 4 = not accurate |                                                                                                                                                                                                                                                                                                                                                             |
|                                  | Diagnosis                                                                   | 1= completely 2 = majority accurate 3 = partially accurate 4 = not accurate |                                                                                                                                                                                                                                                                                                                                                             |
|                                  | Information about STIs/infection                                            | 1= completely 2 = majority accurate 3 = partially accurate 4 = not accurate |                                                                                                                                                                                                                                                                                                                                                             |
|                                  | Management                                                                  | 1= completely 2 = majority accurate 3 = partially accurate 4 = not accurate |                                                                                                                                                                                                                                                                                                                                                             |
|                                  | Partner notification                                                        | 1= completely 2 = majority accurate 3 = partially accurate 4 = not accurate |                                                                                                                                                                                                                                                                                                                                                             |
|                                  | ePrescribing                                                                | 1= completely 2 = majority accurate 3 = partially accurate 4 = not accurate |                                                                                                                                                                                                                                                                                                                                                             |
|                                  | Contraception                                                               | 1= completely 2 = majority accurate 3 = partially accurate 4 = not accurate |                                                                                                                                                                                                                                                                                                                                                             |
|                                  | Service provision                                                           | 1= completely 2 = majority accurate 3 = partially accurate 4 = not accurate |                                                                                                                                                                                                                                                                                                                                                             |
|                                  | Chlamydia                                                                   | 1= completely 2 = majority accurate 3 = partially accurate 4 = not accurate | Completely accurate = all information is accurate; Majority accurate = errors in only 1 aspect of the information (e.g. testing) or no more than 2 minor errors (i.e. will not impact on patient safety) throughout; Partially accurate = errors in more than 1 aspect of the information or more than 2 minor errors; Not accurate = completely inaccurate |
|                                  | Gonorrhoea                                                                  | 1= completely 2 = majority accurate 3 = partially accurate 4 = not accurate |                                                                                                                                                                                                                                                                                                                                                             |
|                                  | Syphilis                                                                    | 1= completely 2 = majority accurate 3 = partially accurate 4 = not accurate |                                                                                                                                                                                                                                                                                                                                                             |
|                                  | Genital warts                                                               | 1= completely 2 = majority accurate 3 = partially accurate 4 = not accurate |                                                                                                                                                                                                                                                                                                                                                             |
|                                  | HPV                                                                         | 1= completely 2 = majority accurate 3 = partially accurate 4 = not accurate |                                                                                                                                                                                                                                                                                                                                                             |
|                                  | Genital herpes                                                              | 1= completely 2 = majority accurate 3 = partially accurate 4 = not accurate |                                                                                                                                                                                                                                                                                                                                                             |
|                                  | Pubic lice                                                                  | 1= completely 2 = majority accurate 3 = partially accurate 4 = not accurate |                                                                                                                                                                                                                                                                                                                                                             |
|                                  | Trichomonas vaginalis                                                       | 1= completely 2 = majority accurate 3 = partially accurate 4 = not accurate |                                                                                                                                                                                                                                                                                                                                                             |
|                                  | Vaginal candidiasis                                                         | 1= completely 2 = majority accurate 3 = partially accurate 4 = not accurate |                                                                                                                                                                                                                                                                                                                                                             |
|                                  | Bacterial vaginosis                                                         | 1= completely 2 = majority accurate 3 = partially accurate 4 = not accurate |                                                                                                                                                                                                                                                                                                                                                             |
|                                  | Non-specific urethritis                                                     | 1= completely 2 = majority accurate 3 = partially accurate 4 = not accurate |                                                                                                                                                                                                                                                                                                                                                             |
| Pelvic inflammatory disease      | 1= completely 2 = majority accurate 3 = partially accurate 4 = not accurate |                                                                             |                                                                                                                                                                                                                                                                                                                                                             |
| Epididymitis                     | 1= completely 2 = majority accurate 3 = partially accurate 4 = not accurate |                                                                             |                                                                                                                                                                                                                                                                                                                                                             |
| Overall content accuracy         | 1= completely 2 = majority accurate 3 = partially accurate 4 = not accurate |                                                                             |                                                                                                                                                                                                                                                                                                                                                             |

**Web Table 5: Summary and additional information**

| Section                | Parameter                                             | Coding                                               | Description                                                                  |
|------------------------|-------------------------------------------------------|------------------------------------------------------|------------------------------------------------------------------------------|
| Additional Information | App allows interaction with a healthcare professional | 1 = yes 2 = no                                       |                                                                              |
|                        | Type of healthcare professional                       | 1 = doctor 2 = nurse 3 = pharmacist 4 = other 99=N/A | Type of HCP app allows contact with                                          |
|                        | Contact via email                                     | 1= yes 2 = no 99 = N/A                               | App allows contact via email                                                 |
|                        | Contact via phone                                     | 1= yes 2= no 99= N/A                                 | App allows contact via phone                                                 |
|                        | Contact via app                                       | 1 = yes 2 = no 99= N/A                               | App allows contact via app                                                   |
|                        | Able to upload photo                                  | 1 = yes 2 = No 99 = N/A                              |                                                                              |
|                        | Able to share info with SPs                           | 1= yes 2= no                                         | Able to share results/information on app with sexual partners                |
|                        | Any other comments                                    | Text                                                 | Any other comments that you think need mentioning that have not been covered |

**Web Table 6: Patient and public information sources**

| STI/Genital infection/<br>safe sex | BASHH patient information leaflet                                                                                                             | NHS Choices webpage                                                                                                                                                                                                                                                                                                                              | Family planning association leaflet                                                                                                                                                                 |
|------------------------------------|-----------------------------------------------------------------------------------------------------------------------------------------------|--------------------------------------------------------------------------------------------------------------------------------------------------------------------------------------------------------------------------------------------------------------------------------------------------------------------------------------------------|-----------------------------------------------------------------------------------------------------------------------------------------------------------------------------------------------------|
| Chlamydia                          |                                                                                                                                               | <a href="http://www.nhs.uk/conditions/Chlamydia/Pages/Introduction.aspx">http://www.nhs.uk/conditions/Chlamydia/Pages/Introduction.aspx</a>                                                                                                                                                                                                      | <a href="http://www.fpa.org.uk/sites/default/files/chlamydia-information-and-advice.pdf">http://www.fpa.org.uk/sites/default/files/chlamydia-information-and-advice.pdf</a>                         |
| Gonorrhoea                         |                                                                                                                                               | <a href="http://www.nhs.uk/conditions/Gonorrhoea/Pages/Introduction.aspx">http://www.nhs.uk/conditions/Gonorrhoea/Pages/Introduction.aspx</a>                                                                                                                                                                                                    | <a href="http://www.fpa.org.uk/sites/default/files/gonorrhoea-information-and-advice.pdf">http://www.fpa.org.uk/sites/default/files/gonorrhoea-information-and-advice.pdf</a>                       |
| Syphilis                           |                                                                                                                                               | <a href="http://www.nhs.uk/conditions/Syphilis/Pages/Introduction.aspx">http://www.nhs.uk/conditions/Syphilis/Pages/Introduction.aspx</a>                                                                                                                                                                                                        | <a href="http://www.fpa.org.uk/sites/default/files/syphilis-information-and-advice.pdf">http://www.fpa.org.uk/sites/default/files/syphilis-information-and-advice.pdf</a>                           |
| Genital warts                      |                                                                                                                                               | <a href="http://www.nhs.uk/conditions/genital_warts/Pages/Introduction.aspx">http://www.nhs.uk/conditions/genital_warts/Pages/Introduction.aspx</a>                                                                                                                                                                                              | <a href="http://www.fpa.org.uk/sites/default/files/genital-warts-information-and-advice.pdf">http://www.fpa.org.uk/sites/default/files/genital-warts-information-and-advice.pdf</a>                 |
| HPV                                |                                                                                                                                               | <a href="http://www.nhs.uk/conditions/vaccinations/pages/hpv-human-papillomavirus-vaccine.aspx">http://www.nhs.uk/conditions/vaccinations/pages/hpv-human-papillomavirus-vaccine.aspx</a><br><a href="http://www.nhs.uk/conditions/genital_warts/Pages/Introduction.aspx">http://www.nhs.uk/conditions/genital_warts/Pages/Introduction.aspx</a> | <a href="http://www.fpa.org.uk/sites/default/files/genital-warts-information-and-advice.pdf">http://www.fpa.org.uk/sites/default/files/genital-warts-information-and-advice.pdf</a>                 |
| Genital herpes                     |                                                                                                                                               | <a href="http://www.nhs.uk/conditions/Genital-herpes/Pages/Introduction.aspx">http://www.nhs.uk/conditions/Genital-herpes/Pages/Introduction.aspx</a>                                                                                                                                                                                            | <a href="http://www.fpa.org.uk/sites/default/files/genital-herpes-information-and-advice.pdf">http://www.fpa.org.uk/sites/default/files/genital-herpes-information-and-advice.pdf</a>               |
| Pubic lice                         |                                                                                                                                               | <a href="http://www.nhs.uk/conditions/pubic-lice/Pages/Introduction.aspx">http://www.nhs.uk/conditions/pubic-lice/Pages/Introduction.aspx</a>                                                                                                                                                                                                    | <a href="http://www.fpa.org.uk/sites/default/files/pubic-lice-scabies-information-and-advice.pdf">http://www.fpa.org.uk/sites/default/files/pubic-lice-scabies-information-and-advice.pdf</a>       |
| Trichomonas vaginalis              | <a href="http://www.bashh.org/documents/TV%20PIL%20Screen%20-%20Edit.pdf">http://www.bashh.org/documents/TV%20PIL%20Screen%20-%20Edit.pdf</a> | <a href="http://www.nhs.uk/conditions/trichomonas_vaginalis/Pages/Introduction.aspx">http://www.nhs.uk/conditions/trichomonas_vaginalis/Pages/Introduction.aspx</a>                                                                                                                                                                              | <a href="http://www.fpa.org.uk/sites/default/files/trichomonas-vaginalis-information-and-advice.pdf">http://www.fpa.org.uk/sites/default/files/trichomonas-vaginalis-information-and-advice.pdf</a> |

| <b>STI/Genital infection/ safe sex</b> | <b>BASHH patient information leaflet</b>                                                                                                      | <b>NHS Choices webpage</b>                                                                                                                                                                                                                                                                                                                       | <b>Family planning association leaflet</b>                                                                                                                                                                                                                                                                                                                                                                                                                                                                                                                  |
|----------------------------------------|-----------------------------------------------------------------------------------------------------------------------------------------------|--------------------------------------------------------------------------------------------------------------------------------------------------------------------------------------------------------------------------------------------------------------------------------------------------------------------------------------------------|-------------------------------------------------------------------------------------------------------------------------------------------------------------------------------------------------------------------------------------------------------------------------------------------------------------------------------------------------------------------------------------------------------------------------------------------------------------------------------------------------------------------------------------------------------------|
| Vaginal candidiasis                    |                                                                                                                                               | <a href="http://www.nhs.uk/conditions/thrush/pages/introduction.aspx">http://www.nhs.uk/conditions/thrush/pages/introduction.aspx</a>                                                                                                                                                                                                            | <a href="http://www.fpa.org.uk/sites/default/files/thrush-bacterial-vaginosis-information-and-advice.pdf">http://www.fpa.org.uk/sites/default/files/thrush-bacterial-vaginosis-information-and-advice.pdf</a>                                                                                                                                                                                                                                                                                                                                               |
| Bacterial vaginosis                    | <a href="http://www.bashh.org/documents/BV%20PIL%20Screen%20-%20Edit.pdf">http://www.bashh.org/documents/BV%20PIL%20Screen%20-%20Edit.pdf</a> |                                                                                                                                                                                                                                                                                                                                                  | <a href="http://www.fpa.org.uk/sites/default/files/thrush-bacterial-vaginosis-information-and-advice.pdf">http://www.fpa.org.uk/sites/default/files/thrush-bacterial-vaginosis-information-and-advice.pdf</a>                                                                                                                                                                                                                                                                                                                                               |
| Non-specific urethritis                |                                                                                                                                               | <a href="http://www.nhs.uk/conditions/non_specific_urethritis/pages/causes.aspx">http://www.nhs.uk/conditions/non_specific_urethritis/pages/causes.aspx</a>                                                                                                                                                                                      | <a href="http://www.fpa.org.uk/sites/default/files/non-specific-urethritis-information-and-advice.pdf">http://www.fpa.org.uk/sites/default/files/non-specific-urethritis-information-and-advice.pdf</a>                                                                                                                                                                                                                                                                                                                                                     |
| Safe sex                               |                                                                                                                                               | <a href="http://www.nhs.uk/conditions/contraception-guide/pages/male-condoms.aspx">http://www.nhs.uk/conditions/contraception-guide/pages/male-condoms.aspx</a><br><a href="http://www.nhs.uk/conditions/contraception-guide/pages/how-do-i-use-condom.aspx">http://www.nhs.uk/conditions/contraception-guide/pages/how-do-i-use-condom.aspx</a> | <a href="http://www.fpa.org.uk/sites/default/files/oral-sex-and-sexually-transmitted-infections.pdf">http://www.fpa.org.uk/sites/default/files/oral-sex-and-sexually-transmitted-infections.pdf</a><br><a href="http://www.fpa.org.uk/sites/default/files/your-guide-to-contraception.pdf">http://www.fpa.org.uk/sites/default/files/your-guide-to-contraception.pdf</a><br><a href="http://www.fpa.org.uk/sites/default/files/male-and-female-condoms-your-guide.pdf">http://www.fpa.org.uk/sites/default/files/male-and-female-condoms-your-guide.pdf</a> |
| General sexual health                  |                                                                                                                                               | <a href="http://www.nhs.uk/conditions/sexually-transmitted-infections/pages/introduction.aspx">http://www.nhs.uk/conditions/sexually-transmitted-infections/pages/introduction.aspx</a>                                                                                                                                                          | <a href="http://www.fpa.org.uk/sites/default/files/your-sexual-health-where-to-get-help-and-advice.pdf">http://www.fpa.org.uk/sites/default/files/your-sexual-health-where-to-get-help-and-advice.pdf</a>                                                                                                                                                                                                                                                                                                                                                   |
| Pelvic inflammatory disease            |                                                                                                                                               | <a href="http://www.nhs.uk/conditions/chlamydia/pages/complications.aspx">http://www.nhs.uk/conditions/chlamydia/pages/complications.aspx</a><br><a href="http://www.nhs.uk/conditions/pelvic-inflammatory-disease/pages/introduction.aspx">http://www.nhs.uk/conditions/pelvic-inflammatory-disease/pages/introduction.aspx</a>                 |                                                                                                                                                                                                                                                                                                                                                                                                                                                                                                                                                             |
| Epididymitis                           |                                                                                                                                               | <a href="http://www.nhs.uk/conditions/chlamydia/pages/complications.aspx">http://www.nhs.uk/conditions/chlamydia/pages/complications.aspx</a>                                                                                                                                                                                                    |                                                                                                                                                                                                                                                                                                                                                                                                                                                                                                                                                             |

**Web Table 7: Summary of basic details (iOS only)**

| Platform | App ID | Title of App                                        | Developer                     | Country | Number of downloads | Rating    | Number of ratings | Age restriction | Theme (e.g. health & fitness) | Price (£) | Last date updated |
|----------|--------|-----------------------------------------------------|-------------------------------|---------|---------------------|-----------|-------------------|-----------------|-------------------------------|-----------|-------------------|
| iOS      | i1     | Sexually transmitted disease (STD) triage           | iDoc24 AB                     | Sweden  | 99                  | No rating | 0                 | 12+             | Medical                       | 0         | 05/02/2014        |
| iOS      | i2     | STD Guide                                           | ViralMesh                     | USA     | 99                  | No rating | 0                 | 12+             | Health & Fitness              | 0         | 17/11/2010        |
| iOS      | i3     | STD Glossary                                        | Space Monkeys LLC             | USA     | 99                  | No rating | 0                 | 9+              | Medical                       | 0         | 02/06/2011        |
| iOS      | i4     | iCondom Coventry                                    | Raaza Ltd                     | UK      | 99                  | No rating | 0                 | 12+             | Health & Fitness              | 0         | 11/07/2012        |
| iOS      | i5     | 99 - The Talk                                       | Oneapp Application Studio Inc | USA     | 99                  | No rating | 0                 | 17+             | Books                         | 2.99      | 23/02/2010        |
| iOS      | i6     | Safer Sex                                           | Jo Langford                   | 99      | 99                  | No rating | 0                 | 12+             | Education                     | 0         | 21/11/2013        |
| iOS      | i7     | STD411                                              | Frank Strona                  | America | 99                  | No rating | 0                 | 17+             | Health & Fitness              | 0         | 08/12/2010        |
| iOS      | i8     | Private Girl Tips                                   | KEYsci                        | USA     | 99                  | No rating | 0                 | 12+             | Health & Fitness              | 1.49      | 26/03/2014        |
| iOS      | i9     | SWISH APP                                           | MyOxygen Limited              | UK      | 99                  | No rating | 0                 | 12+             | Medical                       | 0         | 27/02/2013        |
| iOS      | i10    | Sex Health Dictionary & Sexual Health Video Lessons | WindyApp Studio               | 99      | 99                  | No rating | 0                 | 17+             | Health & Fitness              | 1.99      | 29/08/2014        |
| iOS      | i11    | Safesex Guide                                       | Mobile Identity Danmark Aps   | Denmark | 99                  | No rating | 0                 | 17+             | Health & Fitness              | 1.49      | 16/02/2011        |
| iOS      | i12    | Safe sex                                            | ASD Soft                      | 99      | 99                  | No rating | 0                 | 17+             | Medical                       | 0         | 19/06/2014        |
| iOS      | i13    | SafeSex101                                          | UCLA Student Media            | USA     | 99                  | No rating | 0                 | 17+             | Lifestyle                     | 0         | 24/02/2013        |
| iOS      | i14    | SAFE - Safety Awareness for Everyone                | Harish Subrammaniam           | 99      | 99                  | No rating | 0                 | 17+             | Health & Fitness              | 0         | 15/07/2014        |
| iOS      | i15    | iSex - Sex Education and Terminology                | Hassan Hosam                  | 99      | 99                  | 4         | 5                 | 17+             | Education                     | 1.49      | 09/09/2009        |
| iOS      | i16    | Girls's guide for sex myths                         | Soci solution                 | 99      | 99                  | No rating | 0                 | 17+             | Lifestyle                     | 0.69      | 07/09/2011        |
| iOS      | i17    | CaSH 2 U                                            | ICE                           | UK      | 99                  | No rating | 0                 | 9+              | Health & Fitness              | 0         | 17/07/2013        |
| iOS      | i18    | Pap Test Lite                                       | Elton Nallbati                | 99      | 99                  | No rating | 0                 | 4+              | Medical                       | 0         | 16/02/2013        |
| iOS      | i19    | Natural Yeast Infection Solutions                   | minervaz                      | 99      | 99                  | No rating | 0                 | 4+              | Health & Fitness              | 2.49      | 10/02/2010        |
| iOS      | i20    | A woman's guide to yeast infections                 | Aimfire LLC                   | 99      | 99                  | No rating | 0                 | 12+             | Health & Fitness              | 0.69      | 26/01/2010        |



**Web Table 8: Summary of basic details (Android only)**

| Platform | App ID | Title of App                          | Developer           | Country | Number of downloads | Rating    | Number of ratings | Age restriction | Theme (e.g. health & fitness) | Price (£) | Last date updated |
|----------|--------|---------------------------------------|---------------------|---------|---------------------|-----------|-------------------|-----------------|-------------------------------|-----------|-------------------|
| Android  | a1     | Abnormal Vaginal Discharge            | App D Store         | -       | 10                  | No rating | 0                 | medium maturity | lifestyle                     | 1.25      | 09/10/2011        |
| Android  | a2     | About Herpes Simplex Infection        | Nick Montano        | -       | 50                  | No rating | 0                 | low maturity    | Health & Fitness              | 0         | 02/06/2014        |
| Android  | a3     | After Sex                             | Sachem Software LLC | -       | 10,000              | 3.4       | 42                | high maturity   | Health & Fitness              | 0         | 19/08/2010        |
| Android  | a4     | Bacterial Vaginosis Disease           | Dmitry Grigorinov   | -       | 10                  | No rating | 0                 | everyone        | medical                       | 0         | 25/08/2014        |
| Android  | a5     | Bacterial Vaginosis Guide             | KoolAppz            | -       | 50                  | 5         | 1                 | everyone        | Health & Fitness              | 3.07      | 05/10/2011        |
| Android  | a6     | Bacterial Vaginosis Treatments        | Tokylnc             | -       | 500                 | 4.5       | 2                 | medium maturity | Health & Fitness              | 0         | 24/06/2014        |
| Android  | a7     | Chlamydia Disease and Symptoms        | Michael Perterson   | -       | 1                   | No rating | 0                 | everyone        | medical                       | 0         | 24/08/2014        |
| Android  | a8     | Chlamydia Know it Prevent it Treat it | Kindle Trove Apps   | -       | 10                  | 4         | 2                 | everyone        | Health & Fitness              | 0         | 16/06/2014        |
| Android  | a9     | Deadly Herpes Virus Acyclovir         | WebHoldings         | -       | 10                  | No rating | 0                 | low maturity    | Health & Fitness              | 0         | 21/06/2014        |
| Android  | a10    | Female Herpes                         | IMJava Mobile       | -       | 1000                | 4         | 3                 | medium maturity | medical                       | 0         | 18/04/2013        |
| Android  | a11    | Genital herpes guide                  | Ashi Company        | -       | 10                  | 4         | 1                 | high maturity   | books and reference           | 0         | 28/07/2014        |
| Android  | a12    | Genital Herpes Information            | Naster Solomon      | -       | 10                  | No rating | 0                 | everyone        | medical                       | 0         | 20/08/2014        |
| Android  | a13    | Genital Herpes Treatment              | WebHoldings         | -       | 100                 | 4.7       | 3                 | medium maturity | Health & Fitness              | 0         | 13/06/2014        |
| Android  | a14    | Genital Herpes Treatment              | Ashi Company        | -       | 10                  | No rating | 0                 | high maturity   | medical                       | 0         | 29/07/2014        |
| Android  | a15    | Genital Warts Guide                   | Havana Apps         | -       | 100                 | No rating | 0                 | low maturity    | Health & Fitness              | 0         | 16/05/2014        |
| Android  | a16    | Genital Warts Guide                   | Gooplay app         | -       | 10                  | No rating | 0                 | low maturity    | Health & Fitness              | 0         | 05/06/2014        |
| Android  | a17    | Genital warts info                    | Havana Apps         | -       | 100                 | 3         | 2                 | low maturity    | books and reference           | 0         | 16/05/2014        |
| Android  | a18    | Genital Warts Info                    | Gooplay app         | -       | 100                 | No rating | 0                 | low maturity    | Health & Fitness              | 0         | 05/06/2014        |
| Android  | a19    | Genital Warts Info                    | Ashi Company        | -       | 10                  | 2         | 1                 | medium maturity | books and reference           | 0         | 28/07/2014        |
| Android  | a20    | Genital Warts Information             | Naster Solomon      | -       | 10-50               | No rating | 0                 | everyone        | medical                       | 0         | 20/08/2014        |
| Android  | a21    | Get Rid of Bacterial Vaginosis        | HealthSensei        | -       | 500                 | 5         | 4                 | low maturity    | Health & Fitness              | 0         | 04/12/2013        |
| Android  | a22    | Get Rid of Yeast Infection Now !      | EclipseBoy          | -       | 100                 | 2         | 1                 | everyone        | Health & Fitness              | 0         | 03/11/2013        |
| Android  | a23    | Gonorrhoea Disease & Symptoms         | Naster Solomon      | -       | 50                  | No rating | 0                 | everyone        | medical                       | 0         | 20/08/2014        |
| Android  | a24    | Guide to STDs                         | KoolAppz            | -       | 10                  | 1         | 1                 | everyone        | Health & Fitness              | 3.11      | 13/07/2011        |
| Android  | a25    | Herpes Knowledge                      | Gooplay app         | -       | 50                  | No rating | 0                 | low maturity    | books and reference           | 0         | 15/05/2014        |
| Android  | a26    | Herpes Lupus Psoriasis Eczema         | Yoav Fael           | -       | 100                 | 4.5       | 4                 | everyone        | Health & Fitness              | 0         | 01/06/2014        |
| Android  | a27    | Herpes Treatment                      | KING APPS           | -       | 500                 | 4         | 4                 | everyone        | Health & Fitness              | 0         | 30/05/2013        |

Web Table 8 continued

| Platform | App ID | Title of App                   | Developer                                          | Country  | Number of downloads | Rating    | Number of ratings | Age restriction | Theme (e.g. health & fitness) | Price (£) | Last date updated |
|----------|--------|--------------------------------|----------------------------------------------------|----------|---------------------|-----------|-------------------|-----------------|-------------------------------|-----------|-------------------|
| Android  | a28    | HPV Infection Information      | Naster Solomon                                     | -        | 10                  | No rating | 0                 | everyone        | medical                       | 0         | 26/08/2014        |
| Android  | a29    | iGirl                          | pip90                                              | Uganda   | 100                 | 4.5       | 2                 | everyone        | Health & Fitness              | 0         | 16/06/2013        |
| Android  | a30    | Knowledge of Herpes            | Gooplay app                                        | -        | 10                  | No rating | 0                 | low maturity    | books and reference           | 0         | 05/06/2014        |
| Android  | a31    | No Worries                     | Smartphone Media                                   | UK       | 100                 | 4.7       | 3                 | medium maturity | education                     | 0         | 14/08/2013        |
| Android  | a32    | NORISKS                        | dkberry                                            | UK       | 50                  | No rating | 0                 | everyone        | Health & Fitness              | 0         | 22/07/2011        |
| Android  | a33    | Painful urination in men       | ConstantaSoft Inc                                  | -        | 1                   | No rating | 0                 | everyone        | medical                       | 4.33      | 05/04/2013        |
| Android  | a34    | Pelvic inflammatory disease    | thaweepong kongkratin                              | -        | 50                  | 4         | 3                 | everyone        | medical                       | 0         | 23/08/2014        |
| Android  | a35    | Protection - Sex               | C-Dimensions Ltd                                   | UK       | 5                   | No rating | 0                 | medium maturity | lifestyle                     | 0.59      | 24/02/2011        |
| Android  | a36    | Pubic Lice Crabs Information   | Noppawin sumongdee                                 | -        | 10                  | 4         | 1                 | everyone        | medical                       | 0         | 21/08/2014        |
| Android  | a37    | SAFE                           | Amphibia                                           | Malaysia | 1000                | 4.3       | 34                | medium maturity | Health & Fitness              | 0         | 20/05/2014        |
| Android  | a38    | Safer sex                      | C-Dimensions Ltd                                   | -        | 10                  | No rating | 0                 | medium maturity | lifestyle                     | 0.59      | 24/02/2011        |
| Android  | a39    | Samedaydoctor - STD Testing    | Creat Solutions (UK) Ltd                           | -        | 0                   | No rating | 0                 | medium maturity | medical                       | 0         | 20/08/2014        |
| Android  | a40    | Sexual Education               | Deep Powder Software                               | -        | 5                   | No rating | 0                 | medium maturity | Health & Fitness              | 1.09      | 31/05/2010        |
| Android  | a41    | Sexually transmitted Stds      | noppawin sumongdee                                 | -        | 100                 | 2.5       | 4                 | everyone        | medical                       | 0         | 27/08/2014        |
| Android  | a42    | Sheffield SH                   | Diva Creative                                      | UK       | 100                 | No rating | 0                 | low maturity    | Health & Fitness              | 0         | 09/06/2014        |
| Android  | a43    | STD glossary                   | Publish This, LLC                                  | USA      | 10                  | 4         | 1                 | everyone        | medical                       | 0.72      | 16/09/2013        |
| Android  | a44    | Stop Vaginal Odor              | Gallencraft                                        | -        | 10000-50000         | 4         | 251               | medium maturity | Health & Fitness              | 0         | 25/08/2014        |
| Android  | a45    | Syphilis Disease and Symptoms  | Pachara Kongsookdee                                | -        | 50                  | 3         | 1                 | everyone        | medical                       | 0         | 22/08/2014        |
| Android  | a46    | The Big Book - Symptoms of STD | Jak                                                | -        | 5000                | 4.1       | 15                | everyone        | Health & Fitness              | 0         | 24/01/2013        |
| Android  | a47    | The Sex Guide                  | C-Dimensions Ltd                                   | -        | 10                  | No rating | 0                 | high maturity   | lifestyle                     | 0.59      | 24/02/2011        |
| Android  | a48    | Treat Genital Herpes Naturally | Muhhas                                             | -        | 100                 | No rating | 0                 | high maturity   | Health & Fitness              | 0         | 06/04/2014        |
| Android  | a49    | Trichomoniasis information     | Pachara Kongsookdee                                | -        | 10                  | No rating | 0                 | everyone        | medical                       | 0         | 25/08/2014        |
| Android  | a50    | UCT Safe Sex                   | Information Systems Dept - University of Cape Town | -        | 5000-10000          | 4.2       | 53                | medium maturity | Health & Fitness              | 0         | 09/05/2014        |
| Android  | a51    | Yeast Infection                | Dreamland Apps                                     | -        | 50                  | No rating | 0                 | everyone        | books and reference           | 0         | 21/02/2014        |
| Android  | a52    | Yeast Infection Home Remedy    | Karl Evans                                         | -        | 500                 | No rating | 0                 | everyone        | Health & Fitness              | 0         | 05/11/2012        |

**Web Table 9: Summary of basic details available for both platforms**

| Platform | App ID | Title of App                   | Author                             | Country   | Number of downloads | Android rating | iTune Rating | Android number of ratings | iTune Number of ratings | Android age restriction | iTune Age restriction | Android Theme      | iTune Theme (e.g. health & fitness) | Price (£)   | iTune last date updated | Android Last date updated |
|----------|--------|--------------------------------|------------------------------------|-----------|---------------------|----------------|--------------|---------------------------|-------------------------|-------------------------|-----------------------|--------------------|-------------------------------------|-------------|-------------------------|---------------------------|
| Both     | b1     | C&SH Somerset                  | Scrumplificio us                   | UK        | 500-1000            | 4.7            | No rating    | 7                         | 8                       | Medium maturity         | 12+                   | Health & Fitness   | Health & Fitness                    | 0           | 16/08/2014              | 20/01/2015                |
| Both     | b2     | Conifer Sex Health             | Scrumplificio us                   | UK        | 100                 | 4.2            | No rating    | 4                         | 99                      | Medium maturity         | 12+                   | health and fitness | health and fitness                  | 0           | 14/01/2014              | 17/01/2014                |
| Both     | b3     | FPA - Find a Clinic            | FPA                                | UK        | 100                 | 5              | No rating    | 3                         | 7                       | Medium maturity         | 12+                   | Medical            | Medical                             | 0           | 05/02/2014              | 05/02/2014                |
| Both     | b4     | FREE 2 B ME                    | East Sussex County Council         | UK        | 50 - 100            | 5              | No rating    | 1                         | 0                       | Medium maturity         | 12+                   | Health & Fitness   | Health & fitness                    | 0           | 22/02/2013              | 10/03/2013                |
| Both     | b5     | Get Them Tested                | Codigo Pte Ltd                     | Singapore | 500 - 1,000         | 4              | No rating    | 2                         | 0                       | High maturity           | 12+                   | Health & Fitness   | Health & fitness                    | 0           | 12/05/2014              | 12/05/2014                |
| Both     | b6     | Kent C Card                    | Kent Community Health NHS Trust    | UK        | 500 - 1,000         | 3.7            | No rating    | 3                         | 10                      | Low maturity            | 4+                    | Health & fitness   | Health & fitness                    | 0           | 16/09/2013              | 16/09/2013                |
| Both     | b7     | KIS-SK                         | CollegeMobile, Inc                 | Canada    | 100 - 500           | 4.7            | No rating    | 3                         | 0                       | Low maturity            | 4+                    | Medical            | Medical                             | 0           | 05/05/2014              | 05/05/2014                |
| Both     | b8     | KYSH - Know Your Sexual Health | fixers                             | UK        | 10 to 50            | No rating      | No rating    | 0                         | 0                       | High maturity           | 12+                   | Lifestyle          | Health & Fitness                    | 0           | 16/12/2013              | 22/11/2013                |
| Both     | b9     | My Sex Doctor                  | MYSD LTD                           | UK        | 5000                | 3.7            | No rating    | 73                        | 0                       | High maturity           | 12+                   | Lifestyle          | lifestyle                           | 0           | 26/05/2014              | 26/05/2014                |
| Both     | b10    | NeedTayKnow                    | 99                                 | UK        | 100                 | 4.9            | No rating    | 7                         | 0                       | Medium maturity         | 12+                   | Medical            | education                           | 0           | 03/01/2014              | 03/01/2014                |
| Both     | b11    | SexPositive                    | University of Oregon               | USA       | 10,000 - 50,000     | 3.6            | No rating    | 46                        | 0                       | High maturity           | 17                    | Education          | education                           | 0           | 05/09/2014              | 04/09/2014                |
| Both     | b12    | Sexual Health Guide            | Global Internet Radio Technologies | Ireland   | 50,000 - 100,000    | 4              | No rating    | 234                       | 0                       | Medium maturity         | 17+                   | Education          | education                           | 0           | 24/07/2012              | 05/03/2013                |
| Both     | b13    | Sexual Health Liverpool        | Glow New Media Ltd                 | UK        | 50 - 100            | 4              | No rating    | 1                         | 0                       | Medium maturity         | 12+                   | Health & Fitness   | Health & Fitness                    | 0           | 09/04/2013              | 16/04/2013                |
| Both     | b14    | Your rapid diagnosis STD       | WWW Machealth Pty Ltd              | Australia | 50 - 100            | 0              | 0            | 0                         | 0                       | Everyone                | 17                    | Medical            | Medical                             | £2.99/£3.03 | 19/10/2011              | 29/01/2013                |
| Both     | b15    | Your Choice Your Voice (YCYV)  | Scrumplificio us                   | UK        | 50 - 100            | 4.5            | 0            | 2                         | 0                       | Medium maturity         | 12+                   | health and fitness | health and fitness                  | 0           | 07/10/2014              | 10/10/2014                |

**Web Table 10: Summary of each HON criterion**

|                  |                | Author named (%) | Training stated (%) | Qualification clearly stated (%) | Clearly stated information supportive & not replacement (%) | App mission, purpose & audience stated (%) | Organisation behind app described, including purpose & mission (%) | Privacy policy including information on how emails are managed if used (%) | Documented, referenced & dated (%) | Medical content date of creation present (%) | Medical content date of modification present (%) | Grammar & spelling correct (%) | All claims backed up with scientific evidence | App operational | Information accessible & clearly stated | Method of contacting app publisher | Source/s of funding stated | Conflicts of interest & external influences clearly stated in disclaimer | Those with paying banners have advertising policy | Any conflict of interest explained | Approved by NHS choices |
|------------------|----------------|------------------|---------------------|----------------------------------|-------------------------------------------------------------|--------------------------------------------|--------------------------------------------------------------------|----------------------------------------------------------------------------|------------------------------------|----------------------------------------------|--------------------------------------------------|--------------------------------|-----------------------------------------------|-----------------|-----------------------------------------|------------------------------------|----------------------------|--------------------------------------------------------------------------|---------------------------------------------------|------------------------------------|-------------------------|
| iOS n=20 (%)     | Yes            | 8 (40)           | 3 (15)              | 2 (10)                           | 5 (25)                                                      | 10 (52.6)                                  | 6 (30)                                                             | 2 (10)                                                                     | 0                                  | 0                                            | 0                                                | 18 (90)                        | 0                                             | 19 (95)         | 17 (85)                                 | 8 (40)                             | 2 (10)                     | 0                                                                        | 0                                                 | 0                                  | 0                       |
|                  | Partially      | -                | -                   | -                                | 1 (5)                                                       | 2 (10.5)                                   | 1 (5)                                                              | 1 (5)                                                                      | 0                                  | -                                            | -                                                | -                              | 0                                             | -               | -                                       | -                                  | -                          | -                                                                        | -                                                 | -                                  | -                       |
|                  | No             | 12 (60)          | 17 (85)             | 18 (90)                          | 14 (70)                                                     | 7 (36.8)                                   | 13 (65)                                                            | 17 (85)                                                                    | 20 (100)                           | 20 (100)                                     | 20 (100)                                         | 2 (10)                         | 20 (100)                                      | 1 (5)           | 3 (15)                                  | 12 (60)                            | 18 (90)                    | 19 (95)                                                                  | 3 (15)                                            | 1 (5)                              | 20 (100)                |
|                  | Not applicable | -                | -                   | -                                | -                                                           | -                                          | -                                                                  | -                                                                          | -                                  | -                                            | -                                                | -                              | -                                             | -               | -                                       | -                                  | 0                          | 1 (5)                                                                    | 17 (85)                                           | 19 (15)                            | -                       |
| Android n=52 (%) | Yes            | 18 (35)          | 0                   | 0                                | 20 (38)                                                     | 11 (21)                                    | 2 (4)                                                              | 0                                                                          | 0                                  | 0                                            | 41 (79)                                          | 0                              | 51 (98)                                       | 49 (94)         | 47 (90)                                 | 1 (2)                              | 1 (2)                      | 0                                                                        | 0                                                 | 0                                  | 0                       |
|                  | Partially      | -                | -                   | -                                | 4 (8)                                                       | 26 (50)                                    | 6 (12)                                                             | 0                                                                          | 2 (4)                              | -                                            | -                                                | -                              | 2 (4)                                         | -               | -                                       | -                                  | -                          | -                                                                        | -                                                 | -                                  | -                       |
|                  | No             | 34 (65)          | 52 (100)            | 52 (100)                         | 28 (54)                                                     | 25 (29)                                    | 44 (85)                                                            | 52 (100)                                                                   | 50 (96)                            | 52 (100)                                     | 52 (100)                                         | 11 (21)                        | 50 (96)                                       | 1 (2)           | 3 (6)                                   | 5 (10)                             | 51 (98)                    | 51 (98)                                                                  | 26 (50)                                           | 5 (10)                             | 52 (100)                |
|                  | Not applicable | -                | -                   | -                                | -                                                           | -                                          | -                                                                  | -                                                                          | -                                  | -                                            | -                                                | -                              | -                                             | -               | -                                       | -                                  | 0                          | 0                                                                        | 26 (50)                                           | 47 (90)                            | -                       |
| Both n=15 (%)    | Yes            | 0                | 0                   | 0                                | 4 (27)                                                      | 12 (80)                                    | 8 (53)                                                             | 1 (7)                                                                      | 0                                  | 0                                            | 14 (93)                                          | 0                              | 15 (100)                                      | 11 (73)         | 9 (60)                                  | 1 (7)                              | 0                          | 1 (7)                                                                    | 0                                                 | 2 (13)                             |                         |
|                  | Partially      | -                | -                   | -                                | 2 (13)                                                      | 1 (7)                                      | -                                                                  | 3 (20)                                                                     | 1 (7)                              | -                                            | -                                                | -                              | 2 (13)                                        | -               | -                                       | -                                  | -                          | -                                                                        | -                                                 | -                                  | -                       |
|                  | No             | 15 (100)         | 15 (100)            | 15 (100)                         | 9 (60)                                                      | 2 (13)                                     | 7 (47)                                                             | 11 (73)                                                                    | 14 (93)                            | 52 (100)                                     | 52 (100)                                         | 1 (7)                          | 13 (87)                                       | 0               | 4 (27)                                  | 6 (40)                             | 14 (93)                    | 12 (80)                                                                  | 0                                                 | 0                                  | 13 (87)                 |
|                  | Not applicable | -                | -                   | -                                | -                                                           | -                                          | -                                                                  | -                                                                          | -                                  | -                                            | -                                                | -                              | -                                             | -               | -                                       | -                                  | 0                          | 3 (20)                                                                   | 14 (93)                                           | 15 (100)                           | -                       |
| Total n=87 (%)   | Yes            | 26 (30)          | 3 (3)               | 2 (2)                            | 29 (33)                                                     | 34 (39)                                    | 16 (18)                                                            | 3 (3)                                                                      | 0                                  | 0                                            | 73 (84)                                          | 0                              | 85 (97)                                       | 77 (89)         | 64 (74)                                 | 4 (5)                              | 1 (1)                      | 1 (1)                                                                    | 0                                                 | 2 (2)                              |                         |
|                  | Partially      | -                | -                   | -                                | 7 (8)                                                       | 29 (33)                                    | 14 (16)                                                            | 4 (5)                                                                      | 3 (3)                              | -                                            | -                                                | 4 (5)                          | -                                             | -               | -                                       | -                                  | -                          | -                                                                        | -                                                 | -                                  | -                       |
|                  | No             | 61 (70)          | 2 (84)              | 85 (98)                          | 51 (59)                                                     | 24 (28)                                    | 57 (66)                                                            | 80 (92)                                                                    | 84 (97)                            | 87 (100)                                     | 87 (100)                                         | 14 (16)                        | 83 (95)                                       | 2 (2)           | 10 (11)                                 | 23 (26)                            | 83 (95)                    | 82 (94)                                                                  | 29 (33)                                           | 6 (7)                              | 85 (98)                 |
|                  | Not applicable | -                | -                   | -                                | -                                                           | -                                          | -                                                                  | -                                                                          | -                                  | -                                            | -                                                | -                              | -                                             | -               | -                                       | -                                  | 0                          | 4 (5)                                                                    | 57 (66)                                           | 81 (93)                            | -                       |

**Web Table 11: Comprehensiveness of different parameters**

|                                             | Platform     | Any coverage | Completely comprehensive | Partially comprehensive | Absent   |
|---------------------------------------------|--------------|--------------|--------------------------|-------------------------|----------|
| <b>Safe sex (%)</b>                         | iOS n=20     | 16 (80)      | 1 (5)                    | 15 (75)                 | 4 (20)   |
|                                             | Android n=52 | 40 (77)      | 5 (10)                   | 25 (48)                 | 12 (23)  |
|                                             | Both n=15    | 13 (87)      | 7 (47)                   | 6 (40)                  | 2 (13)   |
|                                             | Total n=87   | 69 (79)      | 13 (15)                  | 56 (64)                 | 18 (21)  |
| <b>Testing (%)</b>                          | iOS n=20     | 11 (55)      | 2 (10)                   | 9 (45)                  | 9 (45)   |
|                                             | Android n=52 | 32 (62)      | 5 (10)                   | 27 (52)                 | 20 (38)  |
|                                             | Both n=15    | 13 (87)      | 7 (47)                   | 6 (40)                  | 2 (13)   |
|                                             | Total n=87   | 56 (64)      | 14 (16)                  | 42 (48)                 | 31 (36)  |
| <b>Diagnosis (%)</b>                        | iOS n=20     | 8 (40)       | 1 (5)                    | 7 (35)                  | 12 (60)  |
|                                             | Android n=52 | 34 (66)      | 4 (8)                    | 30 (58)                 | 18 (35)  |
|                                             | Both n=15    | 10 (66)      | 2 (13)                   | 8 (53)                  | 5 (33)   |
|                                             | Total n=87   | 52 (60)      | 7 (8)                    | 45 (52)                 | 35 (40)  |
| <b>Information about STIs/infection (%)</b> | iOS n=20     | 15 (75)      | 3 (15)                   | 12 (60)                 | 5 (25)   |
|                                             | Android n=52 | 49 (94)      | 7 (13)                   | 42 (81)                 | 3 (6)    |
|                                             | Both n=15    | 14 (93)      | 6 (40)                   | 8 (53)                  | 1 (7)    |
|                                             | Total n=87   | 78 (89)      | 16 (18)                  | 62 (71)                 | 9 (10)   |
| <b>Management (%)</b>                       | iOS n=20     | 10 (50)      | 1 (5)                    | 9 (45)                  | 10 (50)  |
|                                             | Android n=52 | 41 (79)      | 6 (12)                   | 35 (67)                 | 11 (21)  |
|                                             | Both n=15    | 10 (67)      | 3 (20)                   | 7 (47)                  | 5 (33)   |
|                                             | Total n=87   | 61 (70)      | 10 (11)                  | 51 (59)                 | 26 (30)  |
| <b>Partner notification (%)</b>             | iOS n=20     | 4 (20)       | 1 (5)                    | 3 (15)                  | 16 (80)  |
|                                             | Android n=52 | 18 (35)      | 5 (10)                   | 13 (25)                 | 34 (65)  |
|                                             | Both n=15    | 7 (47)       | 3 (20)                   | 4 (27)                  | 8 (53)   |
|                                             | Total n=87   | 29 (33)      | 9 (10)                   | 20 (23)                 | 58 (67)  |
| <b>ePrescribing (%)</b>                     | iOS n=20     | 0            | 0                        | 0                       | 20 (100) |
|                                             | Android n=52 | 0            | 0                        | 0                       | 52 (100) |
|                                             | Both n=15    | 0            | 0                        | 0                       | 15 (100) |
|                                             | Total n=87   | 0            | 0                        | 0                       | 87 (100) |
| <b>Contraception (%)</b>                    | iOS n=20     | 11 (55)      | 1 (5)                    | 10 (50)                 | 9 (45)   |
|                                             | Android n=52 | 9 (17)       | 1 (2)                    | 8 (15)                  | 43 (83)  |
|                                             | Both n=15    | 11 (73)      | 6 (40)                   | 5 (33)                  | 4 (27)   |
|                                             | Total n=87   | 30 (34)      | 8 (9)                    | 22 (25)                 | 57 (66)  |
| <b>Service provision (%)</b>                | iOS n=20     | 9 (45)       | 5 (25)                   | 4 (20)                  | 11 (55)  |
|                                             | Android n=52 | 9 (18)       | 3 (6)                    | 6 (12)                  | 43 (83)  |
|                                             | Both n=15    | 13 (87)      | 13 (87)                  | 0                       | 2 (13)   |
|                                             | Total n=87   | 31 (35)      | 21 (24)                  | 10 (11)                 | 56 (64)  |

Web Table 11 continued

| STI/infection      | Platform       | Any coverage | Completely comprehensive | Partially comprehensive | Absent  | STI/infection             | Platform       | Any coverage | Completely comprehensive | Partially comprehensive | Absent  |
|--------------------|----------------|--------------|--------------------------|-------------------------|---------|---------------------------|----------------|--------------|--------------------------|-------------------------|---------|
| Chlamydia (%)      | iOS (n=20)     | 11 (55)      | 1 (5)                    | 10 (50)                 | 9 (45)  | Trichomonas vaginalis (%) | iOS (n=20)     | 7 (35)       | 1 (5)                    | 6 (30)                  | 13 (65) |
|                    | Android (n=52) | 14 (27)      | 0                        | 14 (27)                 | 38 (73) |                           | Android (n=52) | 10 (19)      | 1 (2)                    | 9 (17)                  | 42 (81) |
|                    | Both (n=15)    | 12 (80)      | 2 (13)                   | 10 (67)                 | 3 (20)  |                           | Both (n=15)    | 7 (47)       | 4 (27)                   | 3 (20)                  | 8 (53)  |
|                    | Total (n=87)   | 37 (42)      | 3 (3)                    | 34 (39)                 | 50 (57) |                           | Total (n=87)   | 24 (28)      | 6 (7)                    | 18 (21)                 | 63 (72) |
| Gonorrhoea (%)     | iOS (n=20)     | 11 (55)      | 1 (5)                    | 10 (50)                 | 9 (45)  | Vaginal candidiasis       | iOS (n=20)     | 9 (45)       | 2 (10)                   | 7 (35)                  | 11 (55) |
|                    | Android (n=52) | 14 (27)      | 1 (2)                    | 13 (25)                 | 38 (73) |                           | Android (n=52) | 8 (16)       | 2 (4)                    | 6 (12)                  | 44 (85) |
|                    | Both (n=15)    | 12 (80)      | 5 (33)                   | 7 (47)                  | 3 (27)  |                           | Both (n=15)    | 6 (40)       | 3 (20)                   | 3 (20)                  | 9 (60)  |
|                    | Total (n=87)   | 37 (42)      | 7 (8)                    | 30 (34)                 | 50 (57) |                           | Total (n=87)   | 23 (26)      | 7 (8)                    | 16 (18)                 | 64 (74) |
| Syphilis (%)       | iOS (n=20)     | 11 (55)      | 1 (5)                    | 10 (50)                 | 9 (45)  | Bacterial vaginosis       | iOS (n=20)     | 2 (10)       | 0                        | 2 (10)                  | 18 (90) |
|                    | Android (n=52) | 12 (23)      | 0                        | 12 (23)                 | 40 (77) |                           | Android (n=52) | 12 (23)      | 2 (4)                    | 10 (19)                 | 40 (77) |
|                    | Both (n=15)    | 11 (73)      | 5 (33)                   | 6 (40)                  | 4 (27)  |                           | Both (n=15)    | 5 (35)       | 3 (20)                   | 2 (15)                  | 10 (65) |
|                    | Total (n=87)   | 34 (39)      | 6 (7)                    | 28 (32)                 | 53 (61) |                           | Total (n=87)   | 19 (22)      | 5 (6)                    | 14 (16)                 | 68 (78) |
| Genital warts (%)  | iOS (n=20)     | 10 (50)      | 2 (10)                   | 8 (40)                  | 10 (50) | NSU                       | iOS (n=20)     | 3 (15)       | 0                        | 3 (15)                  | 17 (85) |
|                    | Android (n=52) | 14 (27)      | 0                        | 14 (27)                 | 38 (73) |                           | Android (n=52) | 5 (10)       | 0                        | 5 (10)                  | 47 (90) |
|                    | Both (n=15)    | 11 (73)      | 4 (27)                   | 7 (47)                  | 4 (27)  |                           | Both (n=15)    | 5 (33)       | 2 (13)                   | 3 (20)                  | 10 (67) |
|                    | Total (n=87)   | 35 (40)      | 6 (7)                    | 29 (33)                 | 52 (60) |                           | Total (n=87)   | 13 (15)      | 2 (2)                    | 11 (13)                 | 74 (85) |
| HPV (%)            | iOS (n=20)     | 11 (55)      | 2 (10)                   | 9 (45)                  | 9 (45)  | PID                       | iOS (n=20)     | 4 (20)       | 0                        | 4 (20)                  | 16 (80) |
|                    | Android (n=52) | 15 (29)      | 0                        | 15 (29)                 | 37 (71) |                           | Android (n=52) | 15 (29)      | 1 (2)                    | 14 (27)                 | 37 (71) |
|                    | Both (n=15)    | 11 (74)      | 4 (27)                   | 7 (47)                  | 4 (27)  |                           | Both (n=15)    | 4 (27)       | 2 (13)                   | 2 (13)                  | 11 (73) |
|                    | Total (n=87)   | 37 (43)      | 6 (7)                    | 31 (36)                 | 50 (57) |                           | Total (n=87)   | 23 (26)      | 3 (3)                    | 20 (23)                 | 64 (74) |
| Genital herpes (%) | iOS (n=20)     | 11 (55)      | 1 (5)                    | 10 (50)                 | 9 (45)  | Epididymitis              | iOS (n=20)     | 3 (15)       | 0                        | 3 (15)                  | 17 (85) |
|                    | Android (n=52) | 24 (46)      | 2 (4)                    | 22 (42)                 | 28 (54) |                           | Android (n=52) | 2 (4)        | 0                        | 2 (4)                   | 50 (96) |
|                    | Both (n=15)    | 12 (80)      | 4 (27)                   | 8 (53)                  | 3 (20)  |                           | Both (n=15)    | 1 (7)        | 0                        | 1 (7)                   | 14 (93) |
|                    | Total (n=87)   | 47 (54)      | 7 (8)                    | 40 (46)                 | 40 (46) |                           | Total (n=87)   | 6 (7)        | 0                        | 6 (7)                   | 81 (93) |
| Pubic lice (%)     | iOS (n=20)     | 7 (35)       | 0                        | 7(35)                   | 13 (65) |                           |                |              |                          |                         |         |
|                    | Android (n=52) | 8 (15)       | 1 (2)                    | 7 (13)                  | 44 (85) |                           |                |              |                          |                         |         |
|                    | Both (n=15)    | 8 (53)       | 4 (27)                   | 4 (27)                  | 7 (47)  |                           |                |              |                          |                         |         |
|                    | Total (n=87)   | 23 (26)      | 5 (6)                    | 18 (21)                 | 64 (74) |                           |                |              |                          |                         |         |

**Web Table 12: Summary table of comprehensiveness of apps (iOS)**

| Platform | App ID | Title of App                                        | Number of content parameters fully comprehensive | Number of STI/infections fully comprehensive | Number of content parameters partially comprehensive | Number of STI/infections partially comprehensive | No of content parameters covered total | Number of STI/infections covered total |
|----------|--------|-----------------------------------------------------|--------------------------------------------------|----------------------------------------------|------------------------------------------------------|--------------------------------------------------|----------------------------------------|----------------------------------------|
| iOS      | i1     | Sexually transmitted disease (STD) triage           | 2                                                | 0                                            | 5                                                    | 7                                                | 7                                      | 7                                      |
| iOS      | i2     | STD Guide                                           | 0                                                | 7                                            | 7                                                    | 0                                                | 7                                      | 7                                      |
| iOS      | i3     | STD Glossary                                        | 1                                                | 0                                            | 5                                                    | 11                                               | 6                                      | 11                                     |
| iOS      | i4     | iCondom Coventry                                    | 1                                                | 0                                            | 0                                                    | 0                                                | 1                                      | 0                                      |
| iOS      | i5     | 99 - The Talk                                       | 3                                                | 2                                            | 3                                                    | 11                                               | 6                                      | 13                                     |
| iOS      | i6     | Safer Sex                                           | 0                                                | 0                                            | 2                                                    | 0                                                | 2                                      | 0                                      |
| iOS      | i7     | STD411                                              | 1                                                | 0                                            | 4                                                    | 4                                                | 5                                      | 4                                      |
| iOS      | i8     | Private Girl Tips                                   | 0                                                | 0                                            | 5                                                    | 9                                                | 5                                      | 9                                      |
| iOS      | i9     | SWISH APP                                           | 1                                                | 0                                            | 0                                                    | 0                                                | 1                                      | 0                                      |
| iOS      | i10    | Sex Health Dictionary & Sexual Health Video Lessons | 0                                                | 0                                            | 6                                                    | 12                                               | 6                                      | 12                                     |
| iOS      | i11    | Safesex Guide                                       | 0                                                | 0                                            | 4                                                    | 11                                               | 4                                      | 11                                     |
| iOS      | i12    | Safe sex                                            | 0                                                | 0                                            | 2                                                    | 0                                                | 2                                      | 0                                      |
| iOS      | i13    | SafeSex101                                          | 2                                                | 0                                            | 5                                                    | 9                                                | 7                                      | 9                                      |
| iOS      | i14    | SAFE - Safety Awareness for Everyone                | 1                                                | 0                                            | 5                                                    | 6                                                | 6                                      | 6                                      |
| iOS      | i15    | iSex - Sex Education and Terminology                | 0                                                | 0                                            | 3                                                    | 10                                               | 3                                      | 10                                     |
| iOS      | i16    | Girls's guide for sex myths                         | 1                                                | 0                                            | 2                                                    | 0                                                | 3                                      | 0                                      |
| iOS      | i17    | CaSH 2 U                                            | 1                                                | 0                                            | 1                                                    | 0                                                | 2                                      | 0                                      |
| iOS      | i18    | Pap Test Lite                                       | 0                                                | 0                                            | 4                                                    | 1                                                | 4                                      | 1                                      |
| iOS      | i19    | Natural Yeast Infection Solutions                   | 0                                                | 1                                            | 3                                                    | 0                                                | 3                                      | 1                                      |
| iOS      | i20    | A woman's guide to yeast infections                 | 1                                                | 1                                            | 3                                                    | 0                                                | 4                                      | 1                                      |

**Web Table 13: Summary table of comprehensiveness of apps (Android)**

| Platform | App ID | Title of App                          | Number of content parameters fully comprehensive | Number of STI/infections fully comprehensive | Number of content parameters partially comprehensive | Number of STI/infections partially comprehensive | No of content parameters covered total | Number of STI/infections covered total |
|----------|--------|---------------------------------------|--------------------------------------------------|----------------------------------------------|------------------------------------------------------|--------------------------------------------------|----------------------------------------|----------------------------------------|
| Android  | a1     | Abnormal Vaginal Discharge            | 0                                                | 0                                            | 3                                                    | 4                                                | 3                                      | 4                                      |
| Android  | a2     | About Herpes Simplex Infection        | 0                                                | 0                                            | 3                                                    | 1                                                | 3                                      | 1                                      |
| Android  | a3     | After Sex                             | 0                                                | 0                                            | 7                                                    | 11                                               | 7                                      | 11                                     |
| Android  | a4     | Bacterial Vaginosis Disease           | 0                                                | 1                                            | 5                                                    | 1                                                | 5                                      | 2                                      |
| Android  | a5     | Bacterial Vaginosis Guide             | 0                                                | 1                                            | 5                                                    | 1                                                | 5                                      | 2                                      |
| Android  | a6     | Bacterial Vaginosis Treatments        | 0                                                | 0                                            | 2                                                    | 2                                                | 2                                      | 2                                      |
| Android  | a7     | Chlamydia Disease and Symptoms        | 1                                                | 0                                            | 5                                                    | 3                                                | 6                                      | 3                                      |
| Android  | a8     | Chlamydia Know it Prevent it Treat it | 0                                                | 0                                            | 2                                                    | 2                                                | 2                                      | 2                                      |
| Android  | a9     | Deadly Herpes Virus Acyclovir         | 0                                                | 0                                            | 4                                                    | 1                                                | 4                                      | 1                                      |
| Android  | a10    | Female Herpes                         | 0                                                | 1                                            | 6                                                    | 0                                                | 6                                      | 1                                      |
| Android  | a11    | Genital herpes guide                  | 0                                                | 0                                            | 3                                                    | 1                                                | 3                                      | 1                                      |
| Android  | a12    | Genital Herpes Information            | 0                                                | 0                                            | 6                                                    | 1                                                | 6                                      | 1                                      |
| Android  | a13    | Genital Herpes Treatment              | 0                                                | 0                                            | 5                                                    | 1                                                | 5                                      | 1                                      |
| Android  | a14    | Genital Herpes Treatment              | 0                                                | 0                                            | 5                                                    | 1                                                | 5                                      | 1                                      |
| Android  | a15    | Genital Warts Guide                   | 1                                                | 0                                            | 3                                                    | 2                                                | 4                                      | 2                                      |
| Android  | a16    | Genital Warts Guide                   | 0                                                | 0                                            | 3                                                    | 2                                                | 3                                      | 2                                      |
| Android  | a17    | Genital warts info                    | 0                                                | 0                                            | 4                                                    | 2                                                | 4                                      | 2                                      |
| Android  | a18    | Genital Warts Info                    | 2                                                | 0                                            | 4                                                    | 2                                                | 6                                      | 2                                      |
| Android  | a19    | Genital Warts Info                    | 0                                                | 0                                            | 4                                                    | 2                                                | 4                                      | 2                                      |
| Android  | a20    | Genital Warts Information             | 1                                                | 0                                            | 4                                                    | 2                                                | 5                                      | 2                                      |
| Android  | a21    | Get Rid of Bacterial Vaginosis        | 1                                                | 0                                            | 1                                                    | 1                                                | 2                                      | 1                                      |
| Android  | a22    | Get Rid of Yeast Infection Now !      | 2                                                | 1                                            | 0                                                    | 0                                                | 2                                      | 1                                      |
| Android  | a23    | Gonorrhoea Disease & Symptoms         | 1                                                | 1                                            | 5                                                    | 2                                                | 6                                      | 3                                      |
| Android  | a24    | Guide to STDs                         | 0                                                | 0                                            | 5                                                    | 10                                               | 5                                      | 10                                     |
| Android  | a25    | Herpes Knowledge                      | 1                                                | 0                                            | 1                                                    | 1                                                | 2                                      | 1                                      |
| Android  | a26    | Herpes Lupus Psoriasis Eczema         | 4                                                | 0                                            | 1                                                    | 1                                                | 5                                      | 1                                      |



**Web Table 13 continued**

| Platform | App ID | Title of App                   | Number of content parameters fully comprehensive | Number of STI/infections fully comprehensive | Number of content parameters partially comprehensive | Number of STI/infections partially comprehensive | No of content parameters covered total | Number of STI/infections covered total |
|----------|--------|--------------------------------|--------------------------------------------------|----------------------------------------------|------------------------------------------------------|--------------------------------------------------|----------------------------------------|----------------------------------------|
| Android  | a27    | Herpes Treatment               | 2                                                | 0                                            | 4                                                    | 1                                                | 6                                      | 1                                      |
| Android  | a28    | HPV Infection Information      | 0                                                | 0                                            | 5                                                    | 2                                                | 5                                      | 2                                      |
| Android  | a29    | iGirl                          | 4                                                | 0                                            | 4                                                    | 10                                               | 8                                      | 10                                     |
| Android  | a30    | Knowledge of Herpes            | 0                                                | 0                                            | 2                                                    | 1                                                | 2                                      | 1                                      |
| Android  | a31    | No Worries                     | 4                                                | 0                                            | 4                                                    | 6                                                | 8                                      | 6                                      |
| Android  | a32    | NORISKS                        | 1                                                | 0                                            | 0                                                    | 0                                                | 1                                      | 0                                      |
| Android  | a33    | Painful urination in men       | 0                                                | 0                                            | 4                                                    | 5                                                | 4                                      | 5                                      |
| Android  | a34    | Pelvic inflammatory disease    | 0                                                | 1                                            | 7                                                    | 2                                                | 7                                      | 3                                      |
| Android  | a35    | Protection - Sex               | 1                                                | 0                                            | 6                                                    | 6                                                | 7                                      | 6                                      |
| Android  | a36    | Pubic Lice Crabs Information   | 1                                                | 1                                            | 5                                                    | 0                                                | 6                                      | 1                                      |
| Android  | a37    | SAFE                           | 4                                                | 0                                            | 2                                                    | 5                                                | 6                                      | 5                                      |
| Android  | a38    | Safer sex                      | 0                                                | 0                                            | 3                                                    | 0                                                | 3                                      | 0                                      |
| Android  | a39    | Samedaydoctor - STD Testing    | 2                                                | 0                                            | 1                                                    | 9                                                | 3                                      | 9                                      |
| Android  | a40    | Sexual Education               | 0                                                | 0                                            | 3                                                    | 4                                                | 3                                      | 4                                      |
| Android  | a41    | Sexually transmitted Stds      | 2                                                | 0                                            | 4                                                    | 6                                                | 6                                      | 6                                      |
| Android  | a42    | Sheffield SH                   | 1                                                | 0                                            | 3                                                    | 0                                                | 4                                      | 0                                      |
| Android  | a43    | STD glossary                   | 0                                                | 0                                            | 5                                                    | 11                                               | 5                                      | 11                                     |
| Android  | a44    | Stop Vaginal Odor              | 0                                                | 0                                            | 5                                                    | 6                                                | 5                                      | 6                                      |
| Android  | a45    | Syphilis Disease and Symptoms  | 0                                                | 0                                            | 6                                                    | 1                                                | 6                                      | 1                                      |
| Android  | a46    | The Big Book - Symptoms of STD | 0                                                | 0                                            | 4                                                    | 10                                               | 4                                      | 10                                     |
| Android  | a47    | The Sex Guide                  | 0                                                | 0                                            | 4                                                    | 0                                                | 4                                      | 0                                      |
| Android  | a48    | Treat Genital Herpes Naturally | 0                                                | 1                                            | 5                                                    | 0                                                | 5                                      | 1                                      |
| Android  | a49    | Trichomoniasis information     | 0                                                | 1                                            | 6                                                    | 0                                                | 6                                      | 1                                      |
| Android  | a50    | UCT Safe Sex                   | 0                                                | 0                                            | 2                                                    | 0                                                | 2                                      | 0                                      |
| Android  | a51    | Yeast Infection                | 0                                                | 0                                            | 1                                                    | 1                                                | 1                                      | 1                                      |
| Android  | a52    | Yeast Infection Home Remedy    | 0                                                | 1                                            | 4                                                    | 0                                                | 4                                      | 1                                      |

**Web Table 14: Summary table of comprehensiveness of apps (Both)**

| Platform | App ID | Title of App                   | Number of content parameters fully comprehensive | Number of STI/infections fully comprehensive | Number of content parameters partially comprehensive | Number of STI/infections partially comprehensive | No of content parameters covered total | Number of STI/infections covered total |
|----------|--------|--------------------------------|--------------------------------------------------|----------------------------------------------|------------------------------------------------------|--------------------------------------------------|----------------------------------------|----------------------------------------|
| Both     | b1     | C&SH Somerset                  | 2                                                | 1                                            | 6                                                    | 7                                                | 8                                      | 8                                      |
| Both     | b2     | Conifer Sex Health             | 5                                                | 7                                            | 3                                                    | 2                                                | 8                                      | 9                                      |
| Both     | b3     | FPA - Find a Clinic            | 7                                                | 11                                           | 1                                                    | 2                                                | 8                                      | 13                                     |
| Both     | b4     | FREE 2 B ME                    | 1                                                | 0                                            | 4                                                    | 4                                                | 5                                      | 4                                      |
| Both     | b5     | Get Them Tested                | 3                                                | 1                                            | 4                                                    | 7                                                | 7                                      | 8                                      |
| Both     | b6     | Kent C Card                    | 1                                                | 0                                            | 3                                                    | 0                                                | 4                                      | 0                                      |
| Both     | b7     | KIS-SK                         | 2                                                | 0                                            | 0                                                    | 0                                                | 2                                      | 0                                      |
| Both     | b8     | KYSH - Know Your Sexual Health | 2                                                | 1                                            | 3                                                    | 5                                                | 5                                      | 6                                      |
| Both     | b9     | My Sex Doctor                  | 5                                                | 10                                           | 2                                                    | 2                                                | 7                                      | 12                                     |
| Both     | b10    | NeedTayKnow                    | 3                                                | 0                                            | 4                                                    | 6                                                | 7                                      | 6                                      |
| Both     | b11    | SexPositive                    | 1                                                | 0                                            | 3                                                    | 6                                                | 4                                      | 6                                      |
| Both     | b12    | Sexual Health Guide            | 6                                                | 0                                            | 2                                                    | 9                                                | 8                                      | 9                                      |
| Both     | b13    | Sexual Health Liverpool        | 2                                                | 0                                            | 3                                                    | 1                                                | 5                                      | 1                                      |
| Both     | b14    | Your rapid diagnosis STD       | 6                                                | 11                                           | 1                                                    | 0                                                | 7                                      | 11                                     |
| Both     | b15    | Your Choice Your Voice (YCV)   | 1                                                | 0                                            | 5                                                    | 12                                               | 6                                      | 12                                     |

**Web Table 15: Accuracy of different parameters**

|                                             | Platform       | Completely accurate | Majority accurate | Partially Accurate | Not accurate |
|---------------------------------------------|----------------|---------------------|-------------------|--------------------|--------------|
| <b>Safe sex (%)</b>                         | iOS (n=16)     | 6 (38)              | 8 (50)            | 2 (13)             | 0            |
|                                             | Android (n=41) | 4 (10)              | 36 (88)           | 1 (2)              | 0            |
|                                             | Both (n=13)    | 13 (100)            | 0                 | 0                  | 0            |
|                                             | Total (n=70)   | 23 (31)             | 44 (63)           | 3 (4)              | 0            |
| <b>Testing (%)</b>                          | iOS (n=12)     | 5 (42)              | 4 (33)            | 3 (25)             | 0            |
|                                             | Android (n=30) | 3 (10)              | 20 (67)           | 7 (23)             | 0            |
|                                             | Both (n=13)    | 12 (92)             | 1 (8)             | 0                  | 0            |
|                                             | Total (n=55)   | 20 (36)             | 25 (45)           | 10 (18)            | 0            |
| <b>Diagnosis (%)</b>                        | iOS (n=8)      | 0                   | 6(75)             | 2 (25)             | 0            |
|                                             | Android (n=34) | 2 (6)               | 23 (68)           | 9 (27)             | 0            |
|                                             | Both (n=9)     | 7 (78)              | 1 (11)            | 1 (11)             | 0            |
|                                             | Total (n=51)   | 9 (18)              | 30 (59)           | 12 (24)            | 0            |
| <b>Information about STIs/infection (%)</b> | iOS (n=15)     | 4 (27)              | 8 (53)            | 2 (20)             | 0            |
|                                             | Android (n=49) | 3 (6)               | 29 (59)           | 17 (35)            | 0            |
|                                             | Both (n=14)    | 8 (57)              | 5 (36)            | 1 (7)              | 0            |
|                                             | Total (n=78)   | 15 (19)             | 42 (54)           | 21 (27)            | 0            |
| <b>Management (%)</b>                       | iOS (n=10)     | 2 (20)              | 6 (60)            | 1 (10)             | 1 (10)       |
|                                             | Android (n=42) | 0                   | 27 (64)           | 15 (36)            | 0            |
|                                             | Both (n=9)     | 8 (89)              | 1 (11)            | 0                  | 0            |
|                                             | Total (n=61)   | 10 (16)             | 34 (56)           | 16 (26)            | 1 (2)        |
| <b>Partner notification (%)</b>             | iOS (n=4)      | 1 (25)              | 3 (75)            | 0                  | 0            |
|                                             | Android (n=19) | 2 (11)              | 15 (79)           | 2 (11)             | 0            |
|                                             | Both           | 3 (43)              | 4 (57)            | 0                  | 0            |
|                                             | Total (n=30)   | 6 (20)              | 22 (73)           | 2 (7)              | 0            |
| <b>ePrescribing (%)</b>                     | iOS            | 0                   | 0                 | 0                  | 0            |
|                                             | Android        | 0                   | 0                 | 0                  | 0            |
|                                             | Both           | 0                   | 0                 | 0                  | 0            |
|                                             | Total          | 0                   | 0                 | 0                  | 0            |
| <b>Contraception (%)</b>                    | iOS (n=11)     | 2 (18)              | 7 (64)            | 2 (18)             | 0            |
|                                             | Android (n=8)  | 1 (13)              | 6 (75)            | 1 (13)             | 0            |
|                                             | Both(n=11)     | 10 (91)             | 1 (9)             | 0                  | 0            |
|                                             | Total (n=30)   | 13 (42)             | 14 (47)           | 3 (10)             | 0            |
| <b>Service provision (%)</b>                | iOS (n=9)      | 6 (67)              | 2 (22)            | 1 (11)             | 0            |
|                                             | Android (n=8)  | 4 (50)              | 3 (38)            | 1 (13)             | 0            |
|                                             | Both (n=12)    | 11 (92)             | 1 (8)             | 0                  | 0            |
|                                             | Total (n=29)   | 21 (72)             | 6 (21)            | 4 (14)             | 0            |

Web Table 15 continued

| STI/infection             | Platform       | Completely accurate | Majority accurate | Partially Accurate | Not accurate |
|---------------------------|----------------|---------------------|-------------------|--------------------|--------------|
| <b>Chlamydia (%)</b>      | iOS (n=11)     | 2 (18)              | 8 (73)            | 1 (9)              | 0            |
|                           | Android (n=14) | 0                   | 12 (86)           | 2 (14)             | 0            |
|                           | Both (n=12)    | 8 (67)              | 3 (25)            | 1 (8)              | 0            |
|                           | Total (n=37)   | 10 (27)             | 23 (62)           | 4 (11)             | 0            |
| <b>Gonorrhoea (%)</b>     | iOS (n=11)     | 3 (27)              | 7 (64)            | 1 (9)              | 0            |
|                           | Android (n=14) | 0                   | 12 (86)           | 2 (14)             | 0            |
|                           | Both(n=12)     | 7 (58)              | 5 (41)            | 0                  | 0            |
|                           | Total (n=37)   | 10 (27)             | 24 (65)           | 3 (8)              | 0            |
| <b>Syphilis (%)</b>       | iOS (n=11)     | 3 (27)              | 6 (55)            | 2 (18)             | 0            |
|                           | Android (n=12) | 1 (8)               | 10 (83)           | 1 (8)              | 0            |
|                           | Both (n=11)    | 8 (73)              | 2 (18)            | 2 (18)             | 0            |
|                           | Total (n=34)   | 12 (35)             | 18 (53)           | 4 (12)             | 0            |
| <b>Genital warts (%)</b>  | iOS (n=10)     | 1 (10)              | 9 (90)            | 0                  | 0            |
|                           | Android (n=15) | 0                   | 8 (53)            | 7 (47)             | 0            |
|                           | Both (n=11)    | 7 (64)              | 4 (36)            | 0                  | 0            |
|                           | Total (n=36)   | 8 (22)              | 21 (58)           | 7 (19)             | 0            |
| <b>HPV (%)</b>            | iOS (n=10)     | 2 (20)              | 7 (70)            | 1 (10)             | 0            |
|                           | Android (n=15) | 0                   | 6 (40)            | 9 (60)             | 0            |
|                           | Both           | 4 (36)              | 7 (64)            | 0                  | 0            |
|                           | Total (n=36)   | 6 (17)              | 20 (57)           | 10 (27)            | 0            |
| <b>Genital herpes (%)</b> | iOS (n=11)     | 3 (27)              | 7 (64)            | 1 (9)              | 0            |
|                           | Android (n=24) | 0                   | 12 (50)           | 12 (50)            | 0            |
|                           | Both (n=12)    | 7 (58)              | 4 (33)            | 1 (8)              | 0            |
|                           | Total (n=47)   | 10 (21)             | 23 (49)           | 14 (30)            | 0            |
| <b>Pubic lice (%)</b>     | iOS (n=7)      | 3 (43)              | 4 (57)            | 0                  | 0            |
|                           | Android (n=8)  | 0                   | 8 (100)           | 0                  | 0            |
|                           | Both (n=8)     | 7 (88)              | 1 (13)            | 0                  | 0            |
|                           | Total          | 10 (43)             | 13 (57)           | 0                  | 0            |

**Web Table 15 continued**

| <b>STI/infection</b>             | <b>Platform</b> | <b>Completely accurate</b> | <b>Majority accurate</b> | <b>Partially Accurate</b> | <b>Not accurate</b> |
|----------------------------------|-----------------|----------------------------|--------------------------|---------------------------|---------------------|
| <b>Trichomonas vaginalis (%)</b> | iOS (n=7)       | 1 (14)                     | 5 (71)                   | 1 (14)                    | 0                   |
|                                  | Android (n=10)  | 0                          | 8 (80)                   | 2 (20)                    | 0                   |
|                                  | Both (n=7)      | 5 (71)                     | 2 (29)                   | 0                         | 0                   |
|                                  | Total (n=24)    | 6 (25)                     | 15 (63)                  | 3 (13)                    | 0                   |
| <b>Vaginal candidiasis (%)</b>   | iOS (n=9)       | 2 (22)                     | 4 (44)                   | 3 (33)                    | 0                   |
|                                  | Android (n=8)   | 1 (13)                     | 2 (26)                   | 5 (63)                    | 0                   |
|                                  | Both (n=6)      | 3 (50)                     | 1 (17)                   | 2 (33)                    | 0                   |
|                                  | Total (n=23)    | 6 (26)                     | 7 (30)                   | 10 (43)                   | 0                   |
| <b>Bacterial vaginosis (%)</b>   | iOS (n=2)       | 1 (50)                     | 1 (50)                   | 0                         | 0                   |
|                                  | Android (n=11)  | 0                          | 6 (55)                   | 5 (45)                    | 0                   |
|                                  | Both (n=5)      | 2 (40)                     | 2 (40)                   | 1 (20)                    | 0                   |
|                                  | Total (n=18)    | 3 (17)                     | 9 (50)                   | 6 (33)                    | 0                   |
| <b>NSU (%)</b>                   | iOS (n=3)       | 1 (33)                     | 2 (67)                   | 0                         | 0                   |
|                                  | Android (n=5)   | 0                          | 4 (80)                   | 1 (20)                    | 0                   |
|                                  | Both (n=5)      | 2 (40)                     | 1 (20)                   | 2 (40)                    | 0                   |
|                                  | Total           | 3 (23)                     | 7 (54)                   | 6 (46)                    | 0                   |
| <b>PID (%)</b>                   | iOS (n=4)       | 1 (25)                     | 3 (75)                   | 0                         | 0                   |
|                                  | Android (n=15)  | 1 (7)                      | 13 (87)                  | 1 (7)                     | 0                   |
|                                  | Both (n=4)      | 2 (50)                     | 2 (50)                   | 0                         | 0                   |
|                                  | Total (n=23)    | 4 (17)                     | 18 (78)                  | 1 (4)                     | 0                   |
| <b>Epididymitis (%)</b>          | iOS (n=20)      | 2 (67)                     | 1 (33)                   | 0                         | 0                   |
|                                  | Android (n=2)   | 1 (50)                     | 1(50)                    | 0                         | 0                   |
|                                  | Both (n=1)      | 1 (100)                    | 0                        | 0                         | 0                   |
|                                  | Total (n=6)     | 4 (67)                     | 2 (33)                   | 0                         | 0                   |
| <b>Overall (%)</b>               | iOS (n=20)      | 6 (30)                     | 11 (55)                  | 3 (15)                    | 0                   |
|                                  | Android (n=52)  | 0                          | 28 (54)                  | 24 (46)                   | 0                   |
|                                  | Both (n=15)     | 7 (47)                     | 7 (47)                   | 1 (7)                     | 0                   |
|                                  | Total (n=87)    | 13 (15)                    | 46 (53)                  | 28 (32)                   | 0                   |

**Web Table 16: Summary table of accuracy of apps (iOS)**

| Platform | App ID | Title of App                                        | Sum of content type accuracy scores | Content type accuracy % | Sum of STI/infection accuracy scores | STI/infection accuracy % | Overall Accuracy score | Overall Accuracy % |
|----------|--------|-----------------------------------------------------|-------------------------------------|-------------------------|--------------------------------------|--------------------------|------------------------|--------------------|
| iOS      | i1     | Sexually transmitted disease (STD) triage           | 13                                  | 97                      | 15                                   | 97                       | 28                     | 97                 |
| iOS      | i2     | STD Guide                                           | 37                                  | 45                      | 39                                   | 40                       | 76                     | 43                 |
| iOS      | i3     | STD Glossary                                        | 28                                  | 77                      | 36                                   | 83                       | 64                     | 80                 |
| iOS      | i4     | iCondom Coventry                                    | 2                                   | 100                     | -                                    | -                        | -                      | -                  |
| iOS      | i5     | 99 - The Talk                                       | 13                                  | 97                      | 27                                   | 99                       | 40                     | 98                 |
| iOS      | i6     | Safer Sex                                           | 8                                   | 67                      | -                                    | -                        | -                      | -                  |
| iOS      | i7     | STD411                                              | 10                                  | 100                     | 8                                    | 100                      | 18                     | 100                |
| iOS      | i8     | Private Girl Tips                                   | 17                                  | 76                      | 29                                   | 80                       | 46                     |                    |
| iOS      | i9     | SWISH APP                                           | 2                                   | 100                     | -                                    | -                        | -                      |                    |
| iOS      | i10    | Sex Health Dictionary & Sexual Health Video Lessons | 17                                  | 87                      | 35                                   | 80                       | 52                     | 83                 |
| iOS      | i11    | Safesex Guide                                       | 16                                  | 67                      | 46                                   | 69                       | 62                     | 68                 |
| iOS      | i12    | Safe sex                                            | 8                                   | 67                      | -                                    | -                        | -                      | -                  |
| iOS      | i13    | SafeSex101                                          | 20                                  | 85                      | 32                                   | 75                       | 52                     | 80                 |
| iOS      | i14    | SAFE - Safety Awareness for Everyone                | 24                                  | 76                      | 21                                   | 75                       | 45                     | 75                 |
| iOS      | i15    | iSex - Sex Education and Terminology                | 12                                  | 67                      | 31                                   | 81                       | 43                     | 74                 |
| iOS      | i16    | Girls's guide for sex myths                         | 10                                  | 77                      | -                                    | -                        | -                      | -                  |
| iOS      | i17    | CaSH 2 U                                            | 4                                   | 100                     | -                                    | -                        | -                      | -                  |
| iOS      | i18    | Pap Test Lite                                       | 16                                  | 67                      | 4                                    | 67                       | 20                     | 67                 |
| iOS      | i19    | Natural Yeast Infection Solutions                   | 16                                  | 44                      | 6                                    | 37                       | 22                     | 39                 |
| iOS      | i20    | A woman's guide to yeast infections                 | 22                                  | 60                      | 6                                    | 37                       | 28                     | 47                 |

**Web Table 17: Summary table of accuracy of apps (Android)**

| Platform | App ID | Title of App                          | Sum of content type accuracy scores | Content type accuracy % | Sum of STI/infection accuracy scores | STI/infection accuracy % | Overall Accuracy score | Overall Accuracy % |
|----------|--------|---------------------------------------|-------------------------------------|-------------------------|--------------------------------------|--------------------------|------------------------|--------------------|
| Android  | a1     | Abnormal Vaginal Discharge            | 10                                  | 78                      | 18                                   | 63                       | 28                     | 67                 |
| Android  | a2     | About Herpes Simplex Infection        | 12                                  | 67                      | 6                                    | 33                       | 18                     | 58                 |
| Android  | a3     | After Sex                             | 23                                  | 79                      | 35                                   | 80                       | 58                     | 80                 |
| Android  | a4     | Bacterial Vaginosis Disease           | 15                                  | 83                      | 6                                    | 83                       | 21                     | 83                 |
| Android  | a5     | Bacterial Vaginosis Guide             | 26                                  | 47                      | 8                                    | 67                       | 34                     | 52                 |
| Android  | a6     | Bacterial Vaginosis Treatments        | 10                                  | 50                      | 9                                    | 58                       | 19                     | 54                 |
| Android  | a7     | Chlamydia Disease and Symptoms        | 17                                  | 86                      | 9                                    | 83                       | 26                     | 85                 |
| Android  | a8     | Chlamydia Know it Prevent it Treat it | 16                                  | 67                      | 6                                    | 83                       | 22                     | 72                 |
| Android  | a9     | Deadly Herpes Virus Acyclovir         | 16                                  | 67                      | 6                                    | 33                       | 22                     | 60                 |
| Android  | a10    | Female Herpes                         | 24                                  | 67                      | 3                                    | 83                       | 27                     | 69                 |
| Android  | a11    | Genital herpes guide                  | 14                                  | 56                      | 5                                    | 50                       | 19                     | 54                 |
| Android  | a12    | Genital Herpes Information            | 19                                  | 81                      | 3                                    | 83                       | 22                     | 81                 |
| Android  | a13    | Genital Herpes Treatment              | 24                                  | 53                      | 5                                    | 50                       | 29                     | 53                 |
| Android  | a14    | Genital Herpes Treatment              | 25                                  | 50                      | 5                                    | 50                       | 30                     | 50                 |
| Android  | a15    | Genital Warts Guide                   | 13                                  | 61                      | 11                                   | 43                       | 24                     | 53                 |
| Android  | a16    | Genital Warts Guide                   | 12                                  | 67                      | 10                                   | 50                       | 22                     | 60                 |
| Android  | a17    | Genital warts info                    | 23                                  | 38                      | 12                                   | 33                       | 35                     | 36                 |
| Android  | a18    | Genital Warts Info                    | 22                                  | 47                      | 12                                   | 33                       | 34                     | 39                 |
| Android  | a19    | Genital Warts Info                    | 23                                  | 38                      | 12                                   | 33                       | 35                     | 36                 |
| Android  | a20    | Genital Warts Information             | 18                                  | 83                      | 6                                    | 83                       | 24                     | 83                 |
| Android  | a21    | Get Rid of Bacterial Vaginosis        | 12                                  | 33                      | 6                                    | 33                       | 18                     | 33                 |
| Android  | a22    | Get Rid of Yeast Infection Now !      | 12                                  | 33                      | 6                                    | 33                       | 18                     | 33                 |
| Android  | a23    | Gonorrhoea Disease & Symptoms         | 17                                  | 86                      | 7                                    | 95                       | 24                     | 89                 |
| Android  | a24    | Guide to STDs                         | 23                                  | 57                      | 44                                   | 64                       | 67                     | 64                 |
| Android  | a25    | Herpes Knowledge                      | 10                                  | 50                      | 5                                    | 50                       | 15                     | 50                 |
| Android  | a26    | Herpes Lupus Psoriasis Eczema         | 11                                  | 97                      | 3                                    | 83                       | 14                     | 94                 |

**Web Table 17 continued**

| Platform | App ID | Title of App                   | Sum of content type accuracy scores | Content type accuracy % | Sum of STI/infection accuracy scores | STI/infection accuracy % | Overall Accuracy score | Overall Accuracy % |
|----------|--------|--------------------------------|-------------------------------------|-------------------------|--------------------------------------|--------------------------|------------------------|--------------------|
| Android  | a27    | Herpes Treatment               | 24                                  | 66.7                    | 5                                    | 50                       | 29                     | 64                 |
| Android  | a28    | HPV Infection Information      | 15                                  | 83.3                    | 6                                    | 83.3                     | 21                     | 83                 |
| Android  | a29    | iGirl                          | 21                                  | 83.3                    | 34                                   | 76.7                     | 55                     | 80                 |
| Android  | a30    | Knowledge of Herpes            | 11                                  | 41.7                    | 5                                    | 50                       | 16                     | 44                 |
| Android  | a31    | No Worries                     | 23                                  | 85.4                    | 18                                   | 83.3                     | 41                     | 85                 |
| Android  | a32    | NORISKS                        | 2                                   | 100                     | -                                    | -                        | -                      | -                  |
| Android  | a33    | Painful urination in men       | 16                                  | 80                      | 20                                   | 66.7                     | 36                     | 73                 |
| Android  | a34    | Pelvic inflammatory disease    | 21                                  | 83.3                    | 9                                    | 83.3                     | 30                     | 83                 |
| Android  | a35    | Protection - Sex               | 17                                  | 92.9                    | 21                                   | 75                       | 38                     | 85                 |
| Android  | a36    | Pubic Lice Crabs Information   | 16                                  | 66.7                    | 3                                    | 83.3                     | 19                     | 81                 |
| Android  | a37    | SAFE                           | 22                                  | 72.2                    | 21                                   | 75.1                     | 43                     | 74                 |
| Android  | a38    | Safer sex                      | 8                                   | 88.9                    | -                                    | -                        | -                      | -                  |
| Android  | a39    | Samedaydoctor - STD Testing    | 11                                  | 72.2                    | 26                                   | 79.1                     | 37                     | 80                 |
| Android  | a40    | Sexual Education               | 14                                  | 55.6                    | 15                                   | 62.5                     | 29                     | 64                 |
| Android  | a41    | Sexually transmitted Stds      | 21                                  | 74.6                    | 21                                   | 75                       | 42                     | 75                 |
| Android  | a42    | Sheffield SH                   | 9                                   | 83.3                    | -                                    | -                        | -                      | -                  |
| Android  | a43    | STD glossary                   | 16                                  | 80                      | 42                                   | 69.7                     | 58                     | 73                 |
| Android  | a44    | Stop Vaginal Odor              | 28                                  | 40                      | 35                                   | 72                       | 63                     | 38                 |
| Android  | a45    | Syphilis Disease and Symptoms  | 18                                  | 83.3                    | 3                                    | 83.3                     | 21                     | 83                 |
| Android  | a46    | The Big Book - Symptoms of STD | 12                                  | 83.3                    | 31                                   | 81.7                     | 43                     | 82                 |
| Android  | a47    | The Sex Guide                  | 18                                  | 73.3                    | -                                    | -                        | -                      | -                  |
| Android  | a48    | Treat Genital Herpes Naturally | 19                                  | 63.3                    | 5                                    | 50                       | 24                     | 67                 |
| Android  | a49    | Trichomoniasis information     | 18                                  | 83.3                    | 3                                    | 83.3                     | 21                     | 83                 |
| Android  | a50    | UCT Safe Sex                   | 6                                   | 83.3                    | -                                    | -                        | -                      | -                  |
| Android  | a51    | Yeast Infection                | 5                                   | 50                      | 5                                    | 50                       | 10                     | 50                 |
| Android  | a52    | Yeast Infection Home Remedy    | 19                                  | 54.2                    | 6                                    | 33.3                     | 25                     | 50                 |



**Web Table 18: Summary table of accuracy of apps (Both)**

| Platform | App ID | Title of App                   | Sum of content type accuracy scores | Content type accuracy % | Sum of STI/infection accuracy scores | STI/infection accuracy % | Overall Accuracy score | Overall Accuracy % |
|----------|--------|--------------------------------|-------------------------------------|-------------------------|--------------------------------------|--------------------------|------------------------|--------------------|
| Both     | b1     | C&SH Somerset                  | 19                                  | 94                      | 18                                   | 96                       | 37                     | 95                 |
| Both     | b2     | Conifer Sex Health             | 18                                  | 96                      | 19                                   | 98                       | 37                     | 97                 |
| Both     | b3     | FPA - Find a Clinic            | 16                                  | 100                     | 26                                   | 100                      | 42                     | 100                |
| Both     | b4     | FREE 2 B ME                    | 13                                  | 90                      | 16                                   | 89                       | 29                     | 89                 |
| Both     | b5     | Get Them Tested                | 13                                  | 97                      | 19                                   | 94                       | 32                     | 95                 |
| Both     | b6     | Kent C Card                    | 10                                  | 92                      | 0                                    | -                        | -                      | -                  |
| Both     | b7     | KIS-SK                         | 6                                   | 83                      | 0                                    | -                        | -                      | -                  |
| Both     | b8     | KYSH - Know Your Sexual Health | 9                                   | 96                      | 12                                   | 100                      | 21                     | 98                 |
| Both     | b9     | My Sex Doctor                  | 14                                  | 100                     | 32                                   | 89                       | 46                     | 94                 |
| Both     | b10    | NeedTayKnow                    | 14                                  | 100                     | 12                                   | 100                      | 26                     | 100                |
| Both     | b11    | SexPositive                    | 9                                   | 96                      | 17                                   | 86                       | 26                     | 91                 |
| Both     | b12    | Sexual Health Guide            | 17                                  | 98                      | 23                                   | 91                       | 40                     | 94                 |
| Both     | b13    | Sexual Health Liverpool        | 10                                  | 100                     | 3                                    | 83                       | 13                     | 92                 |
| Both     | b14    | Your rapid diagnosis STD       | 24                                  | 76                      | 43                                   | 68                       | 67                     | 72                 |
| Both     | b15    | Your Choice Your Voice (YCYV)  | 10                                  | 100                     | 44                                   | 72                       | 54                     | 86                 |

**Web Table 19: Additional Information (iOS)**

| Platform | App ID | Title of App                              | App allows interaction with a healthcare professional (HCP) | Type of HCP | Contact via email | Contact via phone | Contact via app | Able to upload photo | Able to share info on sexual partners | Any other comments                                                                                                                                                                                                                                                                                                                |
|----------|--------|-------------------------------------------|-------------------------------------------------------------|-------------|-------------------|-------------------|-----------------|----------------------|---------------------------------------|-----------------------------------------------------------------------------------------------------------------------------------------------------------------------------------------------------------------------------------------------------------------------------------------------------------------------------------|
| iOS      | i1     | Sexually transmitted disease (STD) triage | Yes                                                         | Doctor      | Yes               | No                | Yes             | Yes                  | No                                    | Clinic locator not accurate or complete, only private clinics. Service provision = send picture of skin concern and get answer from dermatologist within 24h plus clinic locator                                                                                                                                                  |
| iOS      | i2     | STD Guide                                 | No                                                          | -           | -                 | -                 | -               | -                    | No                                    |                                                                                                                                                                                                                                                                                                                                   |
| iOS      | i3     | STD Glossary                              | No                                                          | -           | -                 | -                 | -               | -                    | No                                    | Under definition of HPV they have the definition of HIV                                                                                                                                                                                                                                                                           |
| iOS      | i4     | iCondom Coventry                          | No                                                          | -           | -                 | -                 | -               | -                    | No                                    | Information on where to access condoms but no information on how, why & when you need to use                                                                                                                                                                                                                                      |
| iOS      | i5     | 99 - The Talk                             | No                                                          | -           | -                 | -                 | -               | -                    | No                                    |                                                                                                                                                                                                                                                                                                                                   |
| iOS      | i6     | Safer Sex                                 | No                                                          | -           | -                 | -                 | -               | -                    | No                                    | Only basic facts on contraception: success rate, brief method of action, effective against STD/pregnancy. No side effects, how to use. States emergency contraceptive pill is two pills 12hours apart. Vaguely implies condoms are only method of preventing STIs                                                                 |
| iOS      | i7     | STD411                                    | Yes                                                         | Unknown     | Yes               | Yes               | Yes             | No                   | No                                    | Simple information on STDs including symptoms. No diagnosis or management.                                                                                                                                                                                                                                                        |
| iOS      | i8     | Private Girl Tips                         | No                                                          | -           | -                 | -                 | -               | -                    | No                                    | States to be yeast infection must have itching AND white discharge, wrongly encourages use of baby powder 'down there'. Monistat is the recommended treatment. States Pap smear to be done yearly (USA).                                                                                                                          |
| iOS      | i9     | SWISH APP Sex Health                      | No                                                          | -           | -                 | -                 | -               | -                    | No                                    |                                                                                                                                                                                                                                                                                                                                   |
| iOS      | i10    | Dictionary & Sexual Health Video Lessons  | No                                                          | -           | -                 | -                 | -               | -                    | No                                    |                                                                                                                                                                                                                                                                                                                                   |
| iOS      | i11    | Safesex Guide                             | Yes                                                         | Unknown     | Yes               | No                | Yes             | No                   | No                                    | NSU described as 'urethral catarrh'                                                                                                                                                                                                                                                                                               |
| iOS      | i12    | Safe sex                                  | No                                                          | -           | -                 | -                 | -               | -                    | No                                    |                                                                                                                                                                                                                                                                                                                                   |
| iOS      | i13    | SafeSex101                                | No                                                          | -           | -                 | -                 | -               | -                    | No                                    | Although there isnt a facility to share with partners, the app does have a forum to speak to others about "topics" under a lesson section. Lessons & information section doesn't work                                                                                                                                             |
| iOS      | i14    | SAFE - Safety Awareness for Everyone      | No                                                          | -           | -                 | -                 | -               | -                    | No                                    |                                                                                                                                                                                                                                                                                                                                   |
| iOS      | i15    | iSex - Sex Education and Terminology      | No                                                          | -           | -                 | -                 | -               | -                    | No                                    | In definitions it signposts you to terms that do not exist in the dictionary (e.g. genital herpes) or to a term that you are already in (e.g. diaphragm). In gonorrhoea it tells you about rare complications (without mentioning that they are rare) but doesn't mention common symptoms or the fact that it can be asymptomatic |
| iOS      | i16    | Girls's guide for sex myths               | Yes                                                         | Unknown     | Yes               | No                | No              | No                   | No                                    |                                                                                                                                                                                                                                                                                                                                   |
| iOS      | i17    | CaSH 2 U                                  | Yes                                                         | Unknown     | No                | Yes               | No              | No                   | No                                    | Linked to SeX Factor ICE                                                                                                                                                                                                                                                                                                          |
| iOS      | i18    | Pap Test Lite                             | No                                                          | -           | -                 | -                 | -               | -                    | No                                    |                                                                                                                                                                                                                                                                                                                                   |
| iOS      | i19    | Natural Yeast Infection Solutions         | No                                                          | -           | -                 | -                 | -               | -                    | No                                    | Very wordy and opinionated. Implies that medical practitioners are likely to mismanage the condition and treat with antibiotics. Potentially dangerous in terms of treatment options.                                                                                                                                             |
| iOS      | i20    | A woman's guide to yeast infections       | No                                                          | -           | -                 | -                 | -               | -                    | No                                    | Very similar to Natural Yeast Infection Solutions by Minervaz                                                                                                                                                                                                                                                                     |

\*HCP, health care professional; SP, sexual partner; \*\* Monistat a brand name for miconazole vaginal cream

**Web Table 20: Additional Information (Android)**

| Platform | App ID | Title of App                          | App allows interaction with a healthcare profession (HCP) | Type of HCP | Contact via email | Contact via phone | Contact via app | Able to upload photo | Able to share info on sexual partners | Any other comments                                                                                                                                                                                                                           |
|----------|--------|---------------------------------------|-----------------------------------------------------------|-------------|-------------------|-------------------|-----------------|----------------------|---------------------------------------|----------------------------------------------------------------------------------------------------------------------------------------------------------------------------------------------------------------------------------------------|
| Android  | a1     | Abnormal Vaginal Discharge            | No                                                        | -           | -                 | -                 | -               | -                    | Yes                                   | Able to click to send email containing the information to someone else. Focus on fertility treatments as well as abnormal discharge which seems strange as the two are not necessarily related.                                              |
| Android  | a2     | About Herpes Simplex Infection        | No                                                        | -           | -                 | -                 | -               | -                    | No                                    | Quite a lot of scare mongering. Makes herpes sound really horrendous.                                                                                                                                                                        |
| Android  | a3     | After Sex                             | No                                                        | -           | -                 | -                 | -               | -                    | No                                    | Very good. Links to a website for more information.                                                                                                                                                                                          |
| Android  | a4     | Bacterial Vaginosis Disease           | No                                                        | -           | -                 | -                 | -               | -                    | No                                    | Pictures/photos with text are incongruous - e.g. on page titled 'definition' there is a picture of a CT scanner                                                                                                                              |
| Android  | a5     | Bacterial Vaginosis Guide             | No                                                        | -           | -                 | -                 | -               | -                    | No                                    | Quite scaremongering. Lots of suggestions for natural remedies and natural prevention methods.                                                                                                                                               |
| Android  | a6     | Bacterial Vaginosis Treatments        | No                                                        | -           | -                 | -                 | -               | -                    | No                                    | Links to external websites included in the app and to YouTube videos.                                                                                                                                                                        |
| Android  | a7     | Chlamydia Disease and Symptoms        | No                                                        | -           | -                 | -                 | -               | -                    | No                                    |                                                                                                                                                                                                                                              |
| Android  | a8     | Chlamydia Know it Prevent it Treat it | No                                                        | -           | -                 | -                 | -               | -                    | No                                    | Links to website. No content within actual app.                                                                                                                                                                                              |
| Android  | a9     | Deadly Herpes Virus Acyclovir         | No                                                        | -           | -                 | -                 | -               | -                    | No                                    |                                                                                                                                                                                                                                              |
| Android  | a10    | Female Herpes                         | No                                                        | -           | -                 | -                 | -               | -                    | No                                    | Good information about herpes but then under treatment there are two links to websites selling remedies. Mainly discusses using culture for diagnosing HSV with only a brief mention of PCR                                                  |
| Android  | a11    | Genital herpes guide                  | No                                                        | -           | -                 | -                 | -               | -                    | No                                    | Has game at end. One section links to wikipedia with no obvious relevance. Poorly written and contains very little information. Only mentions HSV-2 as a cause of genital herpes.                                                            |
| Android  | a12    | Genital Herpes Information            | No                                                        | -           | -                 | -                 | -               | -                    | No                                    | Excellent accurate comprehensive app which includes what to expect when you see a healthcare professional, coping support, pregnancy, & episodic & suppressive treatment.                                                                    |
| Android  | a13    | Genital Herpes Treatment              | No                                                        | -           | -                 | -                 | -               | -                    | No                                    | Same info as genital herpes Ashi                                                                                                                                                                                                             |
| Android  | a14    | Genital Herpes Treatment              | No                                                        | -           | -                 | -                 | -               | -                    | No                                    | Linked to genital herpes guide. Only mentions HSV-2 as a cause of genital herpes. Game at end                                                                                                                                                |
| Android  | a15    | Genital Warts Guide                   | No                                                        | -           | -                 | -                 | -               | -                    | No                                    | Scare-mongering e.g. 'Genital warts are bad. If they form in a bunch on your genitals, you will have a very bad time getting them treated and your relationships will shatter'. Same format as genital warts info.                           |
| Android  | a16    | Genital Warts Guide                   | No                                                        | -           | -                 | -                 | -               | -                    | No                                    | Contains very little information. Same format and very similar to Havana app                                                                                                                                                                 |
| Android  | a17    | Genital warts info                    | No                                                        | -           | -                 | -                 | -               | -                    | No                                    | Virus never leaves the body. Much easier to prevent transmission of the virus than to deal with the virus after you have caught it. Multiple inaccuracies & scare-mongering. Link to more information (wikipedia) doesn't work. Game at end. |

Web Table 20 continued

| Platform | App ID | Title of App                    | App allows interaction with a healthcare profession (HCP) | Type of HCP | Contact via email | Contact via phone | Contact via app | Able to upload photo | Able to share info on sexual partners | Any other comments                                                                                                                                                                                                                                                                                                                                                                                                                                                                                                                                                                                                                                                                                                                                                                                                                                                                                                                                                                                                                                                                                                                                                                                                                                                                                                                                                                                                                                                                                                                                                                                                                      |
|----------|--------|---------------------------------|-----------------------------------------------------------|-------------|-------------------|-------------------|-----------------|----------------------|---------------------------------------|-----------------------------------------------------------------------------------------------------------------------------------------------------------------------------------------------------------------------------------------------------------------------------------------------------------------------------------------------------------------------------------------------------------------------------------------------------------------------------------------------------------------------------------------------------------------------------------------------------------------------------------------------------------------------------------------------------------------------------------------------------------------------------------------------------------------------------------------------------------------------------------------------------------------------------------------------------------------------------------------------------------------------------------------------------------------------------------------------------------------------------------------------------------------------------------------------------------------------------------------------------------------------------------------------------------------------------------------------------------------------------------------------------------------------------------------------------------------------------------------------------------------------------------------------------------------------------------------------------------------------------------------|
| Android  | a18    | Genital Warts Info              | No                                                        | -           | -                 | -                 | -               | -                    | No                                    | Exactly the same as Genital Warts Info by Havana apps                                                                                                                                                                                                                                                                                                                                                                                                                                                                                                                                                                                                                                                                                                                                                                                                                                                                                                                                                                                                                                                                                                                                                                                                                                                                                                                                                                                                                                                                                                                                                                                   |
| Android  | a19    | Genital Warts Info              | No                                                        | -           | -                 | -                 | -               | -                    | No                                    | Similar format to Genital warts info by Havana apps. Link to extra information takes you to a wikipedia                                                                                                                                                                                                                                                                                                                                                                                                                                                                                                                                                                                                                                                                                                                                                                                                                                                                                                                                                                                                                                                                                                                                                                                                                                                                                                                                                                                                                                                                                                                                 |
| Android  | a20    | Genital Warts Information       | No                                                        | -           | -                 | -                 | -               | -                    | No                                    |                                                                                                                                                                                                                                                                                                                                                                                                                                                                                                                                                                                                                                                                                                                                                                                                                                                                                                                                                                                                                                                                                                                                                                                                                                                                                                                                                                                                                                                                                                                                                                                                                                         |
| Android  | a21    | Get Rid of Bacterial Vaginosis  | No                                                        | -           | -                 | -                 | -               | -                    | No                                    | Scare mongering. Suggested management includes douching with grapefruit seed extract or hydrogen peroxide. Recommends accessing the bacterial vaginosis freedom guide for further info.                                                                                                                                                                                                                                                                                                                                                                                                                                                                                                                                                                                                                                                                                                                                                                                                                                                                                                                                                                                                                                                                                                                                                                                                                                                                                                                                                                                                                                                 |
| Android  | a22    | Get Rid of Yeast Infection Now! | No                                                        | -           | -                 | -                 | -               | -                    | No                                    | Very similar to itune yeast apps                                                                                                                                                                                                                                                                                                                                                                                                                                                                                                                                                                                                                                                                                                                                                                                                                                                                                                                                                                                                                                                                                                                                                                                                                                                                                                                                                                                                                                                                                                                                                                                                        |
| Android  | a23    | Gonorrhoea Disease & Symptoms   | No                                                        | -           | -                 | -                 | -               | -                    | No                                    |                                                                                                                                                                                                                                                                                                                                                                                                                                                                                                                                                                                                                                                                                                                                                                                                                                                                                                                                                                                                                                                                                                                                                                                                                                                                                                                                                                                                                                                                                                                                                                                                                                         |
| Android  | a24    | Guide to STDs                   | No                                                        | -           | -                 | -                 | -               | -                    | No                                    | When something is sexually transmitted, it means that it has a very significant possibility of being transmitted being animals or human beings through sexual behaviour'. 'By sexual behaviour it does not only mean having vaginal intercourse. In fact, homosexuals can obtain this dreaded disease too through anal and oral sex'. 'Actually, it was only around the 1990's when scientists and medical professionals decided to call sexually transmitted diseases as the venereal diseases'. Refers to STDs as 'a disease' as opposed to individual infections that cause disease. 'Most of the strains of the human papillomavirus cause the onset of cervical cancer...' 'Once women are left untreated with Chlamydia, they become highly likely of acquiring HIV or the human immunodeficiency virus'. Re gonorrhoea: 'a huge percentage of the men who have acquired the infection do not exhibit symptoms.' 'Leaving gonorrhoea untreated will only affect the infected person's joints and heart valves'. Re Trichomonas: 'The great thing about this disease is that it is the number one most curable sexually transmitted disease in the whole world' & 'Many believe that performing a natural douche once in a day while having a warm bath is very helpful. Actually, they are right. But this method will be much more effective is the juice of a single lemon is added as it increases the liquid's parasite-killing power'. 'Those who usually get infected with the genital herpes virus are the poor, those who are addicts with cocaine, those with multiple sexual mates, and also those who are uneducated'. |
| Android  | a25    | Herpes Knowledge                | No                                                        | -           | -                 | -                 | -               | -                    | No                                    | Very similar format to Ashi. Discusses genital herpes only being caused by HSV-2. Infers that you get it by having 'careless casual sex with strangers'. Information on how HSV is transmitted is ambiguous. Read more tab links to herpes simplex page on wikipedia. Game at end.                                                                                                                                                                                                                                                                                                                                                                                                                                                                                                                                                                                                                                                                                                                                                                                                                                                                                                                                                                                                                                                                                                                                                                                                                                                                                                                                                      |
| Android  | a26    | Herpes Lupus Psoriasis Eczema   | No                                                        | -           | -                 | -                 | -               | -                    | No                                    | Describes HSV-3 (zoster/shingles)                                                                                                                                                                                                                                                                                                                                                                                                                                                                                                                                                                                                                                                                                                                                                                                                                                                                                                                                                                                                                                                                                                                                                                                                                                                                                                                                                                                                                                                                                                                                                                                                       |

Web Table 20 continued

| Platform | App ID | Title of App                 | App allows interaction with a healthcare profession (HCP) | Type of HCP | Contact via email | Contact via phone | Contact via app | Able to upload photo | Able to share info on sexual partners | Any other comments                                                                                                                                                                                                                                                                                                                                                                                                                                                                                                                                                                                                                                                                                                                                                                                                                                                                                                                                                                                                                                                                                                                                                                                                                                                                                                                    |
|----------|--------|------------------------------|-----------------------------------------------------------|-------------|-------------------|-------------------|-----------------|----------------------|---------------------------------------|---------------------------------------------------------------------------------------------------------------------------------------------------------------------------------------------------------------------------------------------------------------------------------------------------------------------------------------------------------------------------------------------------------------------------------------------------------------------------------------------------------------------------------------------------------------------------------------------------------------------------------------------------------------------------------------------------------------------------------------------------------------------------------------------------------------------------------------------------------------------------------------------------------------------------------------------------------------------------------------------------------------------------------------------------------------------------------------------------------------------------------------------------------------------------------------------------------------------------------------------------------------------------------------------------------------------------------------|
| Android  | a27    | Herpes Treatment             | No                                                        | -           | -                 | -                 | -               | -                    | No                                    | Both the prescription drug Valtrex and some medicinal herbs have been proven to reduce herpes viral shedding in clinical studies..'Certain medicinal herbs may also be beneficial in creating a strong immune resistance against HSV in non-infected partners'. Incubation period 2-12 days. Women with HSV-2 genital herpes the chance of spreading the virus to a man if they abstain from having sex during outbreaks is approx 3% in a year; for a man to woman - 8%. Video. Estimated 1:4 people in the UK are diagnosed with genital herpes. Genital herpes usually caused by HSV-2. Diet and certain foods can trigger outbreaks. Herpes virus does not pass through latex condoms. If you know that you have come into contact with the virus in the past few minutes or so then simple act of washing the infected area with soap and warm water can help to sweep away the virus from your hands and other areas. By doing this you can help avoid the virus from spreading further. Doesn't mention PCR testing (does mention viral culture, serologic tests and antigen tests). Discusses dietary habits and herbal remedies as ways of managing the infection. Although this app contains a lot of information that is accurate it also contains a lot of information that they claim is backed by evidence and it isn't |
| Android  | a28    | HPV Infection Information    |                                                           |             |                   |                   |                 |                      |                                       |                                                                                                                                                                                                                                                                                                                                                                                                                                                                                                                                                                                                                                                                                                                                                                                                                                                                                                                                                                                                                                                                                                                                                                                                                                                                                                                                       |
| Android  | a29    | iGirl                        | No                                                        | -           | -                 | -                 | -               | -                    | No                                    | Excellent comprehensive app. Crashed on 2 occasions. Centres based in Uganda.                                                                                                                                                                                                                                                                                                                                                                                                                                                                                                                                                                                                                                                                                                                                                                                                                                                                                                                                                                                                                                                                                                                                                                                                                                                         |
| Android  | a30    | Knowledge of Herpes          | No                                                        | -           | -                 | -                 | -               | -                    | No                                    | Exactly the same as Herpes Knowledge by Gooplay Apps. Very similar format to Ashi. Discusses genital herpes only being caused by HSV-2. Infers that you get it by having 'careless casual sex with strangers'. Information on how HSV is transmitted is ambiguous. Read more tab links to herpes simplex page on wikipedia. Game at end.                                                                                                                                                                                                                                                                                                                                                                                                                                                                                                                                                                                                                                                                                                                                                                                                                                                                                                                                                                                              |
| Android  | a31    | No Worries                   | Yes                                                       | Unknown     | No                | Yes               | No              | No                   | No                                    | Comprehensive coverage of certain STIs and contraceptive methods including emergency contraception. Only app to mention both Ellaone and the IUD as methods of emergency contraception. Also discusses pros and cons of certain contraceptive methods.                                                                                                                                                                                                                                                                                                                                                                                                                                                                                                                                                                                                                                                                                                                                                                                                                                                                                                                                                                                                                                                                                |
| Android  | a32    | NORISKS                      | Yes                                                       | Unknown     | No                | Yes               | No              | No                   | No                                    |                                                                                                                                                                                                                                                                                                                                                                                                                                                                                                                                                                                                                                                                                                                                                                                                                                                                                                                                                                                                                                                                                                                                                                                                                                                                                                                                       |
| Android  | a33    | Painful urination in men     | No                                                        | -           | -                 | -                 | -               | -                    | No                                    | Uses the term venereal diseases. Able to answer questions re symptoms but repeatedly got pop up box stating 'This application is not licensed. Please purchase it from Android Market' even though I'd paid £4.11 for the app.                                                                                                                                                                                                                                                                                                                                                                                                                                                                                                                                                                                                                                                                                                                                                                                                                                                                                                                                                                                                                                                                                                        |
| Android  | a34    | Pelvic inflammatory disease  | No                                                        | -           | -                 | -                 | -               | -                    | No                                    |                                                                                                                                                                                                                                                                                                                                                                                                                                                                                                                                                                                                                                                                                                                                                                                                                                                                                                                                                                                                                                                                                                                                                                                                                                                                                                                                       |
| Android  | a35    | Protection - Sex             | No                                                        | -           | -                 | -                 | -               | -                    | No                                    | Initial facts and figures quoted area out of date (references date from 2001) & they have NHS direct number at end rather than 111. In format of leaflet which is not particularly easy to scroll through                                                                                                                                                                                                                                                                                                                                                                                                                                                                                                                                                                                                                                                                                                                                                                                                                                                                                                                                                                                                                                                                                                                             |
| Android  | a36    | Pubic Lice Crabs Information | No                                                        | -           | -                 | -                 | -               | -                    | No                                    |                                                                                                                                                                                                                                                                                                                                                                                                                                                                                                                                                                                                                                                                                                                                                                                                                                                                                                                                                                                                                                                                                                                                                                                                                                                                                                                                       |
| Android  | a37    | SAFE                         | No                                                        | -           | -                 | -                 | -               | -                    | No                                    | Exactly the same as iTunes SAFE app.                                                                                                                                                                                                                                                                                                                                                                                                                                                                                                                                                                                                                                                                                                                                                                                                                                                                                                                                                                                                                                                                                                                                                                                                                                                                                                  |

| Platform | App ID | Title of App                   | App allows interaction with a healthcare profession (HCP) | Type of HCP | Contact via email | Contact via phone | Contact via app | Able to upload photo | Able to share info on sexual partners | Any other comments                                                                                                                                                                                                                                                                                                                                                                                                                                                                                                                                                                                                                                                                                                                                                                                                                                                                                                                                                                                                                                                                                                                                                                                                                                                                                                                                                              |
|----------|--------|--------------------------------|-----------------------------------------------------------|-------------|-------------------|-------------------|-----------------|----------------------|---------------------------------------|---------------------------------------------------------------------------------------------------------------------------------------------------------------------------------------------------------------------------------------------------------------------------------------------------------------------------------------------------------------------------------------------------------------------------------------------------------------------------------------------------------------------------------------------------------------------------------------------------------------------------------------------------------------------------------------------------------------------------------------------------------------------------------------------------------------------------------------------------------------------------------------------------------------------------------------------------------------------------------------------------------------------------------------------------------------------------------------------------------------------------------------------------------------------------------------------------------------------------------------------------------------------------------------------------------------------------------------------------------------------------------|
| Android  | a38    | Safer sex                      | No                                                        | -           | -                 | -                 | -               | -                    | No                                    | Not obvious that you need to scroll through it. Clearly designed as leaflet/booklet and has just been transferred straight in to an app.                                                                                                                                                                                                                                                                                                                                                                                                                                                                                                                                                                                                                                                                                                                                                                                                                                                                                                                                                                                                                                                                                                                                                                                                                                        |
| Android  | a39    | Samedaydoctor - STD Testing    | Yes                                                       | Yes         | Yes               | Yes               | Yes             | No                   | No                                    |                                                                                                                                                                                                                                                                                                                                                                                                                                                                                                                                                                                                                                                                                                                                                                                                                                                                                                                                                                                                                                                                                                                                                                                                                                                                                                                                                                                 |
| Android  | a40    | Sexual Education               | No                                                        | -           | -                 | -                 | -               | -                    | No                                    | Coitus interruptus - can work to prevent pregnancy if done right'                                                                                                                                                                                                                                                                                                                                                                                                                                                                                                                                                                                                                                                                                                                                                                                                                                                                                                                                                                                                                                                                                                                                                                                                                                                                                                               |
| Android  | a41    | Sexually transmitted Stds      | No                                                        | -           | -                 | -                 | -               | -                    | No                                    | Cervical & STI screening is for USA not UK                                                                                                                                                                                                                                                                                                                                                                                                                                                                                                                                                                                                                                                                                                                                                                                                                                                                                                                                                                                                                                                                                                                                                                                                                                                                                                                                      |
| Android  | a42    | Sheffield SH                   | No                                                        | -           | -                 | -                 | -               | -                    | No                                    | Information on condoms links to a You Tube video. Able to send a text to order a chlamydia test kit via the app                                                                                                                                                                                                                                                                                                                                                                                                                                                                                                                                                                                                                                                                                                                                                                                                                                                                                                                                                                                                                                                                                                                                                                                                                                                                 |
| Android  | a43    | STD glossary                   | No                                                        | -           | -                 | -                 | -               | -                    | No                                    | Contains errors - e.g. definition of male condom = itch; Definition of CT discusses trachoma but fails to                                                                                                                                                                                                                                                                                                                                                                                                                                                                                                                                                                                                                                                                                                                                                                                                                                                                                                                                                                                                                                                                                                                                                                                                                                                                       |
| Android  | a44    | Stop Vaginal Odor              | No                                                        | -           | -                 | -                 | -               | -                    | No                                    | The result of PID is a heavy discharge with an extremely noticeable bad smell'. Re Gonorrhoea - 'this sexually transmitted disease causes a pus-like discharge that is accompanied with a rotten odor. It's possible to become re-infected even after each partners has been treated for it'. Re Chlamydia - it can also pass to an unborn baby during pregnancy'. Advises using tea tree oil, garlic & panty liners                                                                                                                                                                                                                                                                                                                                                                                                                                                                                                                                                                                                                                                                                                                                                                                                                                                                                                                                                            |
| Android  | a45    | Syphilis Disease and Symptoms  | No                                                        | -           | -                 | -                 | -               | -                    | No                                    |                                                                                                                                                                                                                                                                                                                                                                                                                                                                                                                                                                                                                                                                                                                                                                                                                                                                                                                                                                                                                                                                                                                                                                                                                                                                                                                                                                                 |
| Android  | a46    | The Big Book - Symptoms of STD | No                                                        | -           | -                 | -                 | -               | -                    | No                                    |                                                                                                                                                                                                                                                                                                                                                                                                                                                                                                                                                                                                                                                                                                                                                                                                                                                                                                                                                                                                                                                                                                                                                                                                                                                                                                                                                                                 |
| Android  | a47    | The Sex Guide                  | No                                                        | -           | -                 | -                 | -               | -                    | No                                    | Contact numbers for different services are out of date                                                                                                                                                                                                                                                                                                                                                                                                                                                                                                                                                                                                                                                                                                                                                                                                                                                                                                                                                                                                                                                                                                                                                                                                                                                                                                                          |
| Android  | a48    | Treat Genital Herpes Naturally | No                                                        | -           | -                 | -                 | -               | -                    | No                                    | Offer of free video if you provide email address. Very small font.                                                                                                                                                                                                                                                                                                                                                                                                                                                                                                                                                                                                                                                                                                                                                                                                                                                                                                                                                                                                                                                                                                                                                                                                                                                                                                              |
| Android  | a49    | Trichomoniasis information     | Unknown                                                   | -           | -                 | -                 | -               | -                    | No                                    |                                                                                                                                                                                                                                                                                                                                                                                                                                                                                                                                                                                                                                                                                                                                                                                                                                                                                                                                                                                                                                                                                                                                                                                                                                                                                                                                                                                 |
| Android  | a50    | UCT Safe Sex                   | No                                                        | -           | -                 | -                 | -               | -                    | No                                    |                                                                                                                                                                                                                                                                                                                                                                                                                                                                                                                                                                                                                                                                                                                                                                                                                                                                                                                                                                                                                                                                                                                                                                                                                                                                                                                                                                                 |
| Android  | a51    | Yeast Infection                | No                                                        | -           | -                 | -                 | -               | -                    | No                                    | Candida (found in yeast infections) can infect your blood, causing an overload of toxins to disrupt your system, wreaking havoc on your mind and body. App finishes by saying that there is a really helpful guide/report but not stating which one this is and not discussing how vulvovaginal candidiasis can be treated.                                                                                                                                                                                                                                                                                                                                                                                                                                                                                                                                                                                                                                                                                                                                                                                                                                                                                                                                                                                                                                                     |
| Android  | a52    | Yeast Infection Home Remedy    | No                                                        | -           | -                 | -                 | -               | -                    | No                                    | The symptoms they describe could also be HSV - e.g. 'burning and tingling sensation' 'make walking, switching positions, urinating and sexual intercourse difficult'. 'Sufferers are more likely to develop allergies inhaling airborne mold. Damp, dark locations can make them feel worse. They may also display a craving for sugar, breads, carbohydrates & alcohol, though sufferers may not necessarily be tolerant to alcohol. But even then these symptoms altogether may make you a candidate for another infection called bacterial vaginosis, which merits its own article.' 'Also, when left unchecked, thrush may cause dangerous side-effects, such as endometriosis, ovarian dysfunction and the release of toxins which may further jeopardize your immune system'. 'But if the yeast in our bodies reach more than the normal levels, that's when yeast infection strikes. Yeast infection causes our bodies to produce too much yeast and is triggered by a fungus called Candida albicans'. 'Vaginal yeast infection happens more to women after menopause'. Treatment and prevention includes dietary advice, apple cider vinegar solution, garlic, cranberry pills, olive leaf and grapefruit seed extract mixed together, raw garlic juice, hydrogen peroxide. Article based on book 'yeast infection no more' by Linda Allen. Repetitive & very lengthy. |

**Web Table 21: Additional Information (Both platforms)**

| Platform | App ID | Title of App                   | App allows interaction with a healthcare profession (HCP) | Type of HCP | Contact via email | Contact via phone | Contact via app | Able to upload photo | Able to share info on sexual partners | Any other comments                                                                                                                                                                                                                                                                                                                                                                                                                                                                                                                                                           |
|----------|--------|--------------------------------|-----------------------------------------------------------|-------------|-------------------|-------------------|-----------------|----------------------|---------------------------------------|------------------------------------------------------------------------------------------------------------------------------------------------------------------------------------------------------------------------------------------------------------------------------------------------------------------------------------------------------------------------------------------------------------------------------------------------------------------------------------------------------------------------------------------------------------------------------|
| Both     | b1     | C&SH Somerset                  | 2                                                         | -           | -                 | -                 | -               | -                    | 2                                     | Partner notification and treatment is only mentioned with regards to pubic lice, scabies and gonorrhoea. Specific names of drug treatments not mentioned. Provides information on where to acquire condoms and GUM services, but does not emphasise importance of regular check up                                                                                                                                                                                                                                                                                           |
| Both     | b2     | Conifer Sex Health             | 1                                                         | Unknown     | 2                 | 1                 | 2               | 2                    | 2                                     |                                                                                                                                                                                                                                                                                                                                                                                                                                                                                                                                                                              |
| Both     | b3     | FPA - Find a Clinic            | 2                                                         | -           | -                 | -                 | -               | -                    | 2                                     | Information on all STIs not actually in app but in downloadable leaflets. I have included this information as it was very easy to download the leaflets within the app.                                                                                                                                                                                                                                                                                                                                                                                                      |
| Both     | b4     | FREE 2 B ME                    | 1                                                         | Unknown     | 2                 | 2                 | 1               | 2                    | 2                                     | NHS branded app. Vaguely mentions condoms are only method of preventing STIs. STIs described generally specifically mentioned in examples only. Diagnostic tests not expanded further than swabs and urine tests. No management. 'Without treatment, some STIs such as Chlamydia, HIV, Herpes, HPV and Hepatitis may stop you having a baby naturally' 'Most STIs can be treated easily with medicine. But, you should always use a condom as some STIs such as HIV, Herpes, HPV and Hepatitis have no cure, and if the symptoms are left untreated could cause infertility' |
| Both     | b5     | Get Them Tested                | 1                                                         | Unknown     | 1                 | 1                 | 2               | 2                    | 1                                     | Unable to access partner notification module unless you have attended their clinic. Incorrectly states HPV is bloodborne                                                                                                                                                                                                                                                                                                                                                                                                                                                     |
| Both     | b6     | Kent C Card                    | 2                                                         | -           | -                 | -                 | -               | -                    | 2                                     | Cites 'is your wee dark, or does it smell bad?' as a reason to get tested for STIs. Doesn't mention asymptomatic infection. Location of clinic services, condom dispensers. Contact information of services.                                                                                                                                                                                                                                                                                                                                                                 |
| Both     | b7     | KIS-SK                         | 2                                                         | -           | -                 | -                 | -               | -                    | 2                                     | Doesn't mention copper coil role in EC. Doesn't mention IUS. % quoted aren't accurate. Questions/answers on contraception & safe sex. Clinic finder for contraception & STIs. States OCP is taken everyday, no mention of 7day break. States patch worn for 7day, replaced weekly. Success rates of some contraceptive methods are much lower than those stated in NHS choices                                                                                                                                                                                               |
| Both     | b8     | KYSH - Know Your Sexual Health | 2                                                         | -           | -                 | -                 | -               | -                    | 2                                     | Descriptions of STIs basic eg few example symptoms. Only mentions antivirals for herpes, no management for other STIs. No mention of avoiding STI, use of condom, safe sex. General info on tests - bloods, swabs, urine.                                                                                                                                                                                                                                                                                                                                                    |

Web Table 21 continued

| Platform | App ID | Title of App                 | App allows interaction with a healthcare profession (HCP) | Type of HCP | Contact via email | Contact via phone | Contact via app | Able to upload photo | Able to share info on sexual partners | Any other comments                                                                                                                                                                                                                                                                                                                                                                                                                                                                                                                                                                                                                                                                                                                                                                                                                                                   |
|----------|--------|------------------------------|-----------------------------------------------------------|-------------|-------------------|-------------------|-----------------|----------------------|---------------------------------------|----------------------------------------------------------------------------------------------------------------------------------------------------------------------------------------------------------------------------------------------------------------------------------------------------------------------------------------------------------------------------------------------------------------------------------------------------------------------------------------------------------------------------------------------------------------------------------------------------------------------------------------------------------------------------------------------------------------------------------------------------------------------------------------------------------------------------------------------------------------------|
| Both     | b9     | My Sex Doctor                | 2                                                         | -           | -                 | -                 | -               | -                    | 2                                     | Drug management is not specifically named, simply as antibiotics. Description of NGU: 'Acronym for nongonococcal urethritis, an infection caused by bacteria. The areas primarily affected by NGU are the cervix and the urethra. Typical symptoms are discharge from the penis or vagina and a burning sensation during urination. The infection can be sexually transmitted'                                                                                                                                                                                                                                                                                                                                                                                                                                                                                       |
| Both     | b10    | NeedTayKnow                  | 2                                                         | -           | -                 | -                 | -               | -                    | 2                                     | Specific treatment names not mentioned; only antibiotics, antivirals, cream. Does not mention cervical cancer risk of HPV. No mention of how often to get tested. Diagnostic tests not explained further than generalised 'pee in a pot', swabs and blood.                                                                                                                                                                                                                                                                                                                                                                                                                                                                                                                                                                                                           |
| Both     | b11    | SexPositive                  | 2                                                         | -           | -                 | -                 | -               | -                    | 2                                     | Link from herpes page doesn't work. Information on chlamydia inaccurate and scaremongering. Risk tool not accurate. STD description included transmission, symptoms and complications. Nothing on diagnosis or management. Doesn't specify how often you should get STD check.                                                                                                                                                                                                                                                                                                                                                                                                                                                                                                                                                                                       |
| Both     | b12    | Sexual Health Guide          | 2                                                         | -           | -                 | -                 | -               | -                    | 2                                     | Diagnostic tests mentioned as swabs, bloods or urine sample. Treatments mentioned only as antibiotics, antivirals, creams etc. Sources listed at end. Extensive list of contraceptives, dis/advantages, contraindications, success rates, MoA                                                                                                                                                                                                                                                                                                                                                                                                                                                                                                                                                                                                                        |
| Both     | b13    | Sexual Health Liverpool      | 2                                                         | -           | -                 | -                 | -               | -                    | 2                                     | Brief sentence each for different types of contraception. Very extensive list of available sexual health services. Does not mention what happens in STI testing, diagnostic tests or management of STIs. Briefly mentions chlamydia.                                                                                                                                                                                                                                                                                                                                                                                                                                                                                                                                                                                                                                 |
| Both     | b14    | Your rapid diagnosis STD     | 4                                                         | -           | -                 | -                 | -               | -                    | 2                                     | No specific information on CT despite being the commonest STI. Drug managements are not specific to UK; dosage, routes, first-line etc incorrect. Incorrectly states warts are caused by HPV 1, Gardasil vaccine protects against HPV1 (not 11) and is approved for use in girls 9-26. Vaccine 100% effective in preventing infection with HPV types 16,18, 1 & 6. Herpetic urethritis occurs in 30-40% of affected men. Re candida vulvovaginitis: 'although transmission is thought to be mainly sexual, non-sexual infection can also occur'. Yeast may be visualised directly under the microscope using a KOH preparation; 'ensure partner is treated to prevent reinfection'. Re NSU: 'Treatment should cover NG as this organism is present in about 50% of cases. ELISA test for CT. When doing the risk assessment, chlamydia doesn't come up as an option. |
| Both     | b15    | Your Choice Your Voice (YCV) | 4                                                         | -           | -                 | -                 | -               | -                    | 2                                     | The app links to a web application that provides people with more information on STIs and contraception. Able to join C card and order a chlamydia test online. BV, thrush and NSU are all discussed under the same section together e.g. 'If left untreated they can cause reduced fertility, inflammation of the joints, urethra and eyes, long-term pelvic pain, ectopic (outside the womb) pregnancy, blocked fallopian tubes, testicle and prostate infection'. Re HSV: 'This is called asymptomatic shedding or viral shedding and is extremely contagious'                                                                                                                                                                                                                                                                                                    |
